# Supplementary material for: Longitudinal population-level HIV epidemiologic and genomic surveillance highlights growing gender disparity of HIV transmission in Uganda
Source: PubMed Central journal article supplement (PMC10769880; doi:10.1038/s41564-023-01530-8), 2023-12-05
Supplement: 41564_2023_1530_MOESM1_ESM.pdf [file 41564_2023_1530_MOESM1_ESM.pdf]

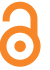

# **Longitudinal population-level HIV epidemiologic and genomic surveillance highlights growing gender disparity of HIV transmission in Uganda**

---

In the format provided by the authors and unedited

## 1 List of Figures

|    |    |                                                                                                                                                                                                                                                                                                                                                                                                                                                                                                                               |    |
|----|----|-------------------------------------------------------------------------------------------------------------------------------------------------------------------------------------------------------------------------------------------------------------------------------------------------------------------------------------------------------------------------------------------------------------------------------------------------------------------------------------------------------------------------------|----|
| 2  | S1 | <b>Flowchart of census eligible individuals through to individuals in the incidence and transmission cohorts.</b> . . . . .                                                                                                                                                                                                                                                                                                                                                                                                   | S2 |
| 3  |    |                                                                                                                                                                                                                                                                                                                                                                                                                                                                                                                               |    |
| 4  | S2 | <b>Schema illustrating the refinement of phylogenetic time since infection estimates.</b> . . . . .                                                                                                                                                                                                                                                                                                                                                                                                                           | S6 |
| 5  |    |                                                                                                                                                                                                                                                                                                                                                                                                                                                                                                                               |    |
| 6  | S3 | <b>Comparison of incidence rate estimates under an individual-level additive effects Poisson regression model and a population-level LOESS model with independent age effects in each survey round.</b>                                                                                                                                                                                                                                                                                                                       |    |
| 7  |    |                                                                                                                                                                                                                                                                                                                                                                                                                                                                                                                               |    |
| 8  |    |                                                                                                                                                                                                                                                                                                                                                                                                                                                                                                                               |    |
| 9  |    | (a) Mean and 95% uncertainty ranges of longitudinal age-specific incidence rates obtained with the individual-level additive effects Poisson regression model used in the central analysis (b) Same using a population-level LOESS model with independent age effects in each survey round. . . . .                                                                                                                                                                                                                           | S7 |
| 10 |    |                                                                                                                                                                                                                                                                                                                                                                                                                                                                                                                               |    |
| 11 |    |                                                                                                                                                                                                                                                                                                                                                                                                                                                                                                                               |    |
| 12 |    |                                                                                                                                                                                                                                                                                                                                                                                                                                                                                                                               |    |
| 13 | S4 | <b>Comparison of incidence rate estimated on data containing all communities and data subset to 28 continuously surveyed communities</b> (a) Mean and 95% uncertainty ranges of longitudinal age-specific incidence rates estimated on data from all communities surveyed (b) Same using data subset to 28 continuously surveyed communities. . . . .                                                                                                                                                                         | S8 |
| 14 |    |                                                                                                                                                                                                                                                                                                                                                                                                                                                                                                                               |    |
| 15 |    |                                                                                                                                                                                                                                                                                                                                                                                                                                                                                                                               |    |
| 16 |    |                                                                                                                                                                                                                                                                                                                                                                                                                                                                                                                               |    |
| 17 |    |                                                                                                                                                                                                                                                                                                                                                                                                                                                                                                                               |    |
| 18 |    |                                                                                                                                                                                                                                                                                                                                                                                                                                                                                                                               |    |
| 19 |    |                                                                                                                                                                                                                                                                                                                                                                                                                                                                                                                               |    |
| 20 | S5 | <b>Sensitivity in estimating the age of transmitting partners to right censoring of likely transmission pairs.</b> Posterior median (line) and 95% credible interval (ribbon) of the age of male transmitting partners by the age of the infected female (x-axis) by survey round (row facet) for the central and sensitivity analyses (column facet). Median and 95% credible interval of the age of male transmitting partners across the age of the infected female is indicated with a triangle and an error bar. . . . . | S9 |
| 21 |    |                                                                                                                                                                                                                                                                                                                                                                                                                                                                                                                               |    |
| 22 |    |                                                                                                                                                                                                                                                                                                                                                                                                                                                                                                                               |    |
| 23 |    |                                                                                                                                                                                                                                                                                                                                                                                                                                                                                                                               |    |
| 24 |    |                                                                                                                                                                                                                                                                                                                                                                                                                                                                                                                               |    |
| 25 |    |                                                                                                                                                                                                                                                                                                                                                                                                                                                                                                                               |    |
| 26 |    |                                                                                                                                                                                                                                                                                                                                                                                                                                                                                                                               |    |
| 27 |    |                                                                                                                                                                                                                                                                                                                                                                                                                                                                                                                               |    |

## 28 List of Tables

|    |     |                                                                                                                   |     |
|----|-----|-------------------------------------------------------------------------------------------------------------------|-----|
| 29 | S1  | <b>Characteristics of the RCCS study population.</b> . . . . .                                                    | S11 |
| 30 | S2  | <b>Communities surveyed by RCCS in rounds 10-18.</b> . . . . .                                                    | S13 |
| 31 | S3  | <b>Characteristics of the longitudinal HIV incidence cohort.</b> . . . . .                                        | S14 |
| 32 | S4  | <b>Model comparison for estimating longitudinal, age-specific incidence rates.</b> . . . . .                      | S16 |
| 33 |     |                                                                                                                   |     |
| 34 | S5  | <b>Longitudinal HIV deep-sequencing.</b> . . . . .                                                                | S17 |
| 35 | S6  | <b>Model comparison for estimating longitudinal, age-specific transmission flows.</b> . . . . .                   | S19 |
| 36 |     |                                                                                                                   |     |
| 37 | S7  | <b>Longitudinal HIV transmission flows by age and gender.</b> . . . . .                                           | S20 |
| 38 | S8  | <b>Sexual behaviour characteristics in RCCS participants, round 15, October 08 2011 - July 05 2013.</b> . . . . . | S21 |
| 39 |     |                                                                                                                   |     |
| 40 | S9  | <b>Self-reported ART use and viral suppression in RCCS participants with HIV.</b> . . . . .                       | S22 |
| 41 |     |                                                                                                                   |     |
| 42 | S10 | <b>Sensitivity analyses.</b> . . . . .                                                                            | S23 |

## 43 **Rakai Health Sciences Program consortium members** 44 **(all)**

45 Larry W Chang<sup>3,2,11</sup>, Ronald M Galiwango<sup>2</sup>, M Kate Grabowski<sup>2,14,11</sup>, Ronald  
46 H Gray<sup>13</sup>, Jade C Jackson<sup>14</sup>, Joseph Kagaayi<sup>2</sup>, Edward Nelson Kankaka<sup>3,4</sup>,  
47 Godfrey Kigozi<sup>2</sup>, Oliver Laeyendecker<sup>15,16</sup>, Thomas C Quinn<sup>14,15,16</sup>, Steven J.  
48 Reynolds<sup>2,15,16</sup>, John Santelli<sup>18</sup>, David Serwadda<sup>2,19</sup>, Nelson K. Sewankambo<sup>19</sup>,  
49 Joseph Ssekasanvu<sup>11</sup>, Robert Ssekubugu<sup>2</sup>, Victor Ssempijja<sup>5,6</sup>, Maria J Wawer<sup>2,11</sup>,  
50 Dorean Nabukalu<sup>2</sup>, Anthony Ndyanabo<sup>2</sup>, Joseph Ssekasanvu<sup>2</sup>, Hadijja Nakawooya<sup>2</sup>,  
51 Jessica Nakukumba<sup>2</sup>, Grace N. Kigozi<sup>2</sup>, Betty S. Nantume<sup>2</sup>, Nampijja Resty<sup>2</sup>, Jedi-  
52 dah Kambasu<sup>2</sup>, Margaret Nalugemwa<sup>2</sup>, Regina Nakabuye<sup>2</sup>, Lawrence Ssebanobe<sup>2</sup>,  
53 Justine Nankinga<sup>2</sup>, Adrian Kayiira<sup>2</sup>, Gorreth Nanfuka<sup>2</sup>, Ruth Ahimbisibwe<sup>2</sup>,  
54 Stephen Tomusange<sup>2</sup>, Sarah Kalibbali<sup>2</sup>, Margaret Nakalanzi<sup>2</sup>, Joseph Ouma Otobi<sup>2</sup>,  
55 Denis Ankunda<sup>2</sup>, Joseph Lister Ssembatya<sup>2</sup>, John Baptist Ssemanda<sup>2</sup>, Robert  
56 Kairania<sup>2</sup>, Emmanuel Kato<sup>2</sup>, Alice Kisakye<sup>2</sup>, James Batte<sup>2</sup>, James Ludigo<sup>2</sup>,  
57 Abisagi Nampijja<sup>2</sup>, Steven Watya<sup>2</sup>, Kighoma Nehemia<sup>2</sup>, Sr. Margaret Anyokot<sup>2</sup>,  
58 Joshua Mwinike<sup>2</sup>, George Kibumba<sup>2</sup>, Paschal Ssebowa<sup>2</sup>, George Mondo<sup>2</sup>, Francis  
59 Wasswa<sup>2</sup>, Agnes Nantongo<sup>2</sup>, Rebecca Kakembo<sup>2</sup>, Josephine Galiwango<sup>2</sup>, Geof-  
60 frey Ssemango<sup>2</sup>, Andrew D. Redd<sup>2</sup>, Caitlin E. Kennedy<sup>2</sup>, Jennifer Wagman<sup>2</sup>, Philip  
61 Kreniske<sup>2</sup>, Nelson Sewankambo<sup>2</sup>

## 62 **PANGEA-HIV-2 consortium members (all)**

63 Lucie Abeler Dörner<sup>7</sup>, Helen Ayles<sup>29,23</sup>, David Bonsall<sup>9,10</sup>, Rory Bowden<sup>9,24</sup>,  
64 Vincent Calvez<sup>25</sup>, Max Essex<sup>26</sup>, Sarah Fidler<sup>22,27</sup>, Christophe Fraser<sup>10,7</sup>, Tanya  
65 Golubchik<sup>12,7</sup>, M Kate Grabowski<sup>2,14,11</sup>, Ravindra Gupta<sup>28</sup>, Richard Hayes<sup>22,20</sup>,  
66 Joshua Herbeck<sup>30</sup>, Joseph Kagaayi<sup>2</sup>, Pontiano Kaleebu<sup>31</sup>, Jairam Lingappa<sup>30</sup>,  
67 Sikhulile Moyo<sup>26</sup>, Vladimir Novitsky<sup>32</sup>, Thumbi Ndung'u<sup>33</sup>, Deenan Pillay<sup>34</sup>,  
68 Thomas C Quinn<sup>14,15,16</sup>, Andrew Rambaut<sup>35</sup>, Oliver Ratmann<sup>1</sup>, Janet Seeley<sup>31,36</sup>,  
69 Deogratius Ssemwanga<sup>31</sup> & Frank Tanser<sup>33</sup>, Maria J Wawer<sup>2,11</sup>

70

71 <sup>23</sup> Zambart, University of Zambia, Ridgeway Campus, Lusaka, Zambia.72 <sup>24</sup> Department of Statistics, Oxford University, Oxford, United Kingdom.73 <sup>25</sup> Institut Pasteur, Paris, France.74 <sup>26</sup> Botswana Harvard AIDS Institute Partnership, Gaborone, Botswana.75 <sup>27</sup> Department of Infectious Disease, Imperial College London, London, United  
76 Kingdom.77 <sup>28</sup> Department of Medicine, University of Cambridge, Cambridge, United King-  
78 dom.79 <sup>29</sup> Department of Infectious Disease Epidemiology and International Health, The  
80 London School of Hygiene & Tropical Medicine, London, United Kingdom.81 <sup>30</sup> University of Washington, Seattle, Washington, United States.82 <sup>31</sup> MRC/UVRI, Entebbe, Uganda.83 <sup>32</sup> Harvard University, Cambridge, Massachusetts, United States.84 <sup>33</sup> Africa Health Research Institute (AHRI), Durban, South Africa.

85 <sup>34</sup> University College London, London, United Kingdom.

86 <sup>35</sup> University of Edinburgh, Edinburgh, United Kingdom.

87 <sup>36</sup> Department of Global Health and Development, The London School of  
88 Hygiene & Tropical Medicine, London, United Kingdom.

89

90 **S1 Supplementary Figures**

S2 LIST OF TABLES

Round 10

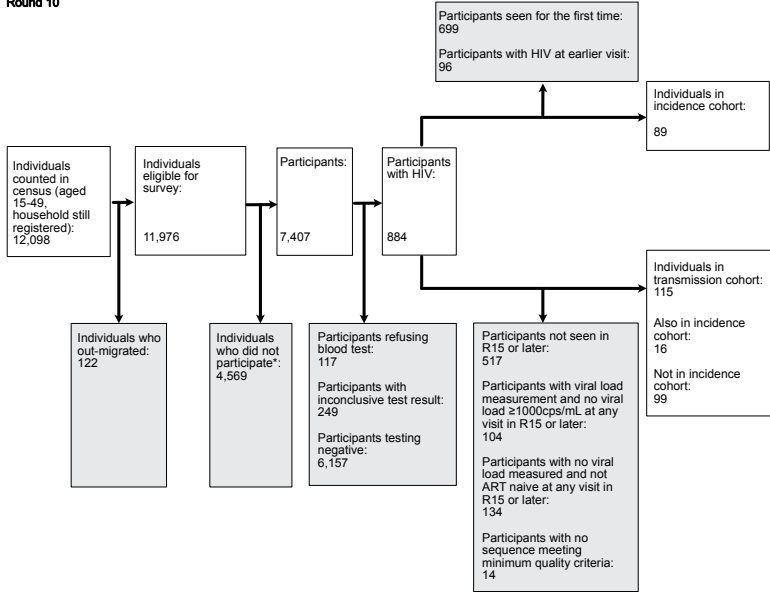

Round 11

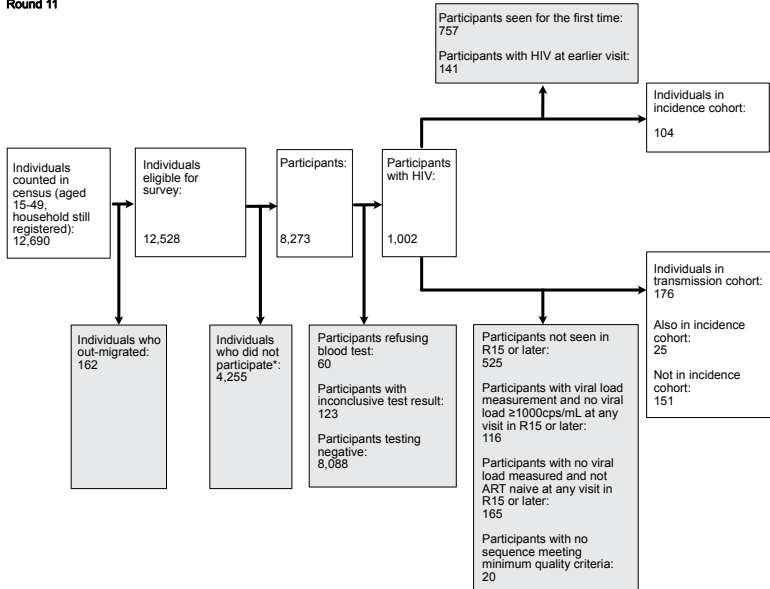

Supplementary Fig. S1: Flowchart of census eligible individuals through to individuals in the incidence and transmission cohorts.

**Round 12**

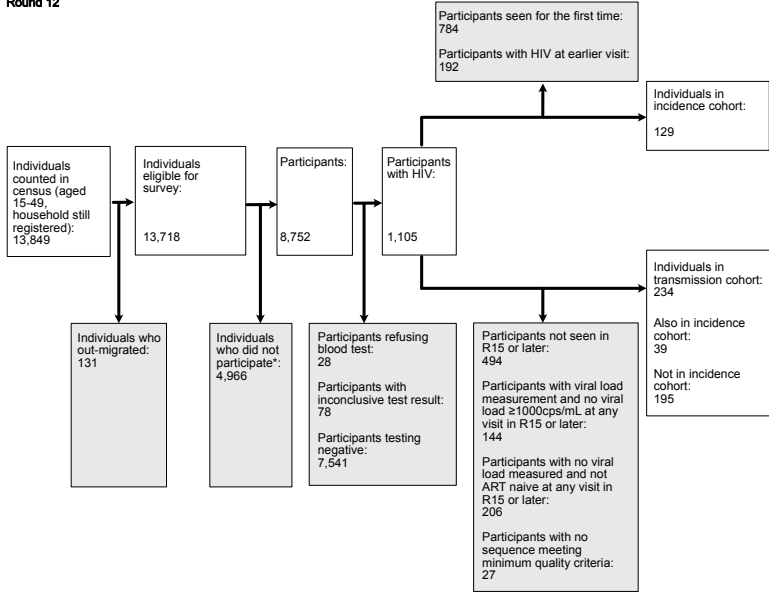

**Round 13**

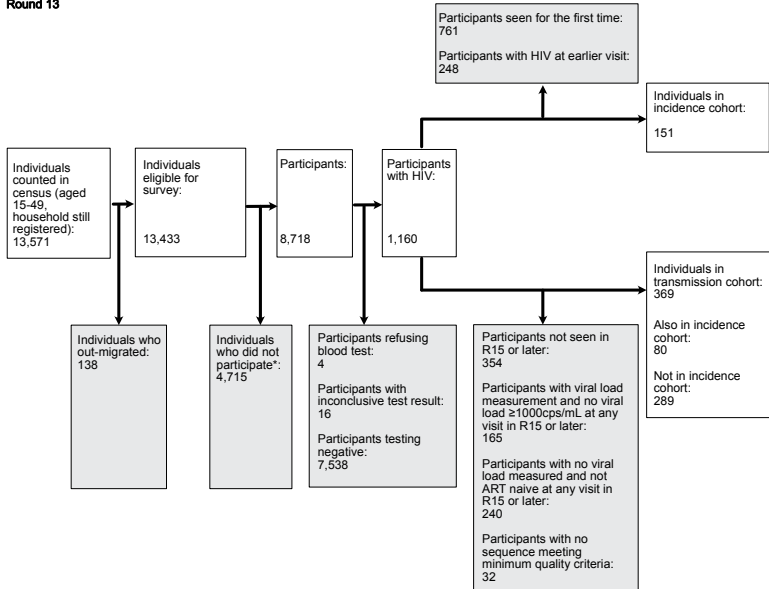

**Supplementary Fig. S1: Flowchart of census eligible individuals through to individuals in the incidence and transmission cohorts. (cont.)**

S4 LIST OF TABLES

Round 14

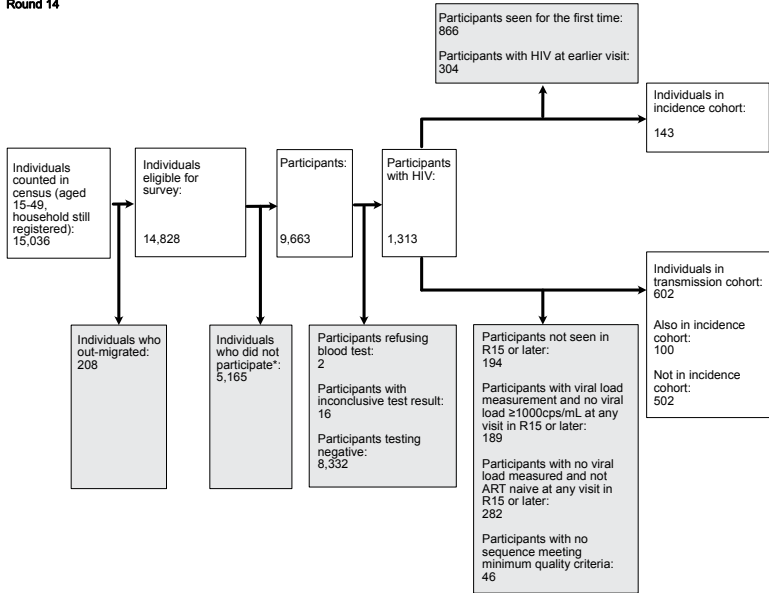

Round 15

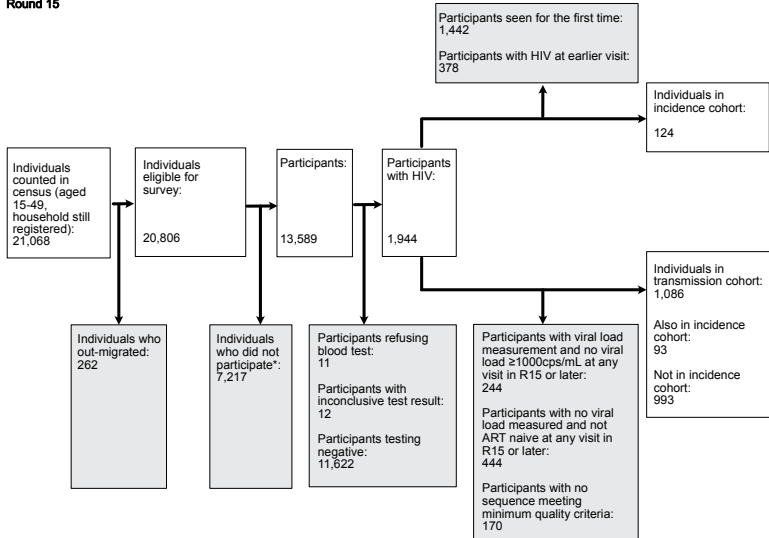

Supplementary Fig. S1: Flowchart of census eligible individuals through to individuals in the incidence and transmission cohorts. (cont.)

**Round 16**

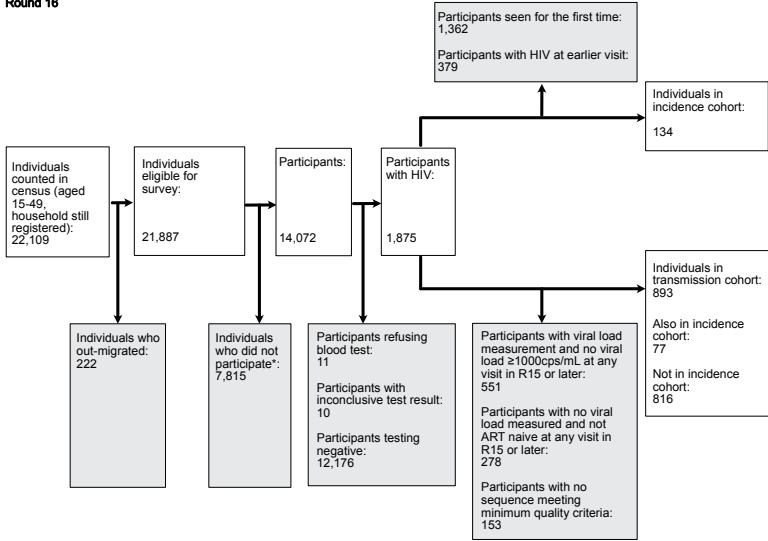

**Round 17**

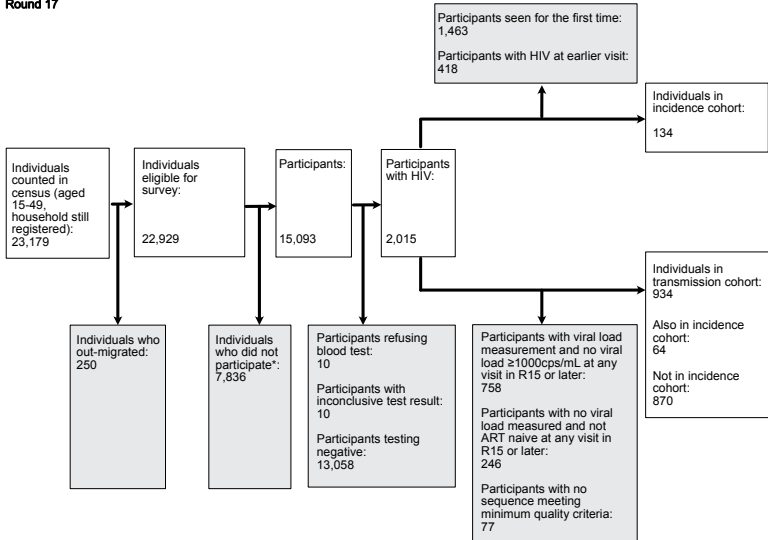

**Supplementary Fig. S1: Flowchart of census eligible individuals through to individuals in the incidence and transmission cohorts. (cont.)**



Round 18

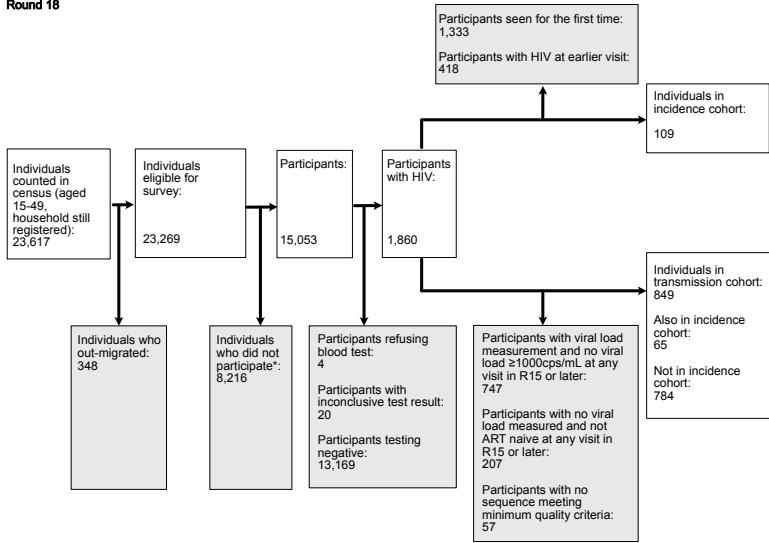

**Supplementary Fig. S1: Flowchart of census eligible individuals through to individuals in the incidence and transmission cohorts. (cont.)**

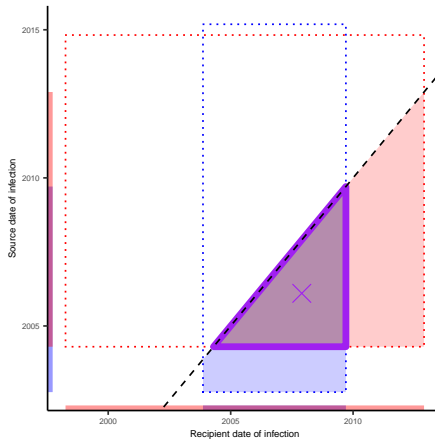

**Supplementary Fig. S2: Schema illustrating the refinement of phylogenetic time since infection estimates.**

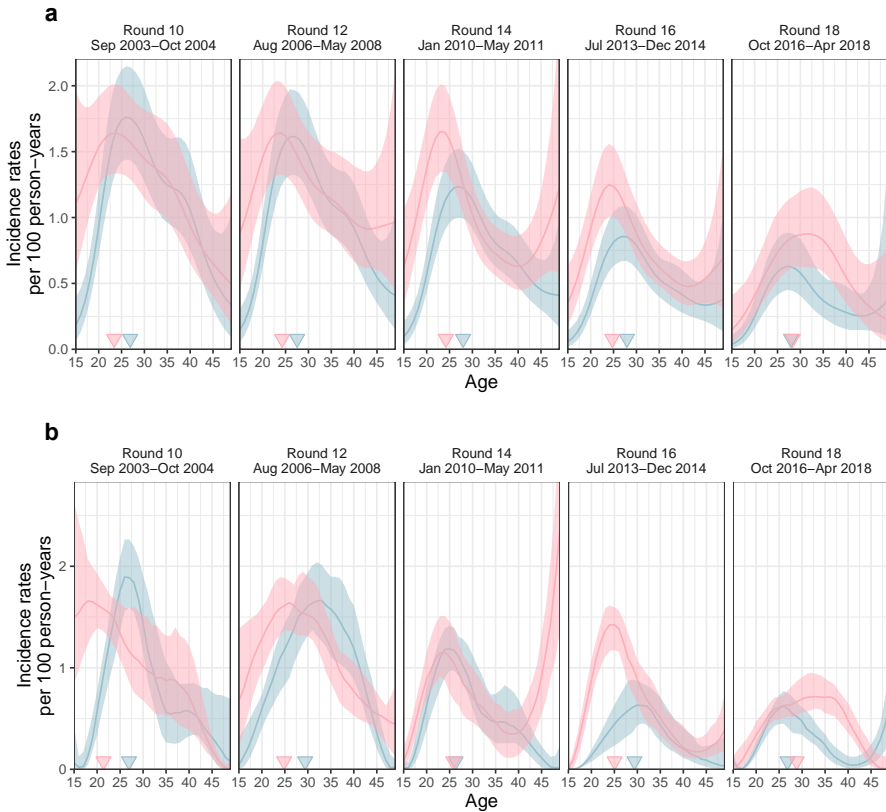

**Supplementary Fig. S3: Comparison of incidence rate estimates under an individual-level additive effects Poisson regression model and a population-level LOESS model with independent age effects in each survey round. (a) Mean and 95% uncertainty ranges of longitudinal age-specific incidence rates obtained with the individual-level additive effects Poisson regression model used in the central analysis (b) Same using a population-level LOESS model with independent age effects in each survey round.**

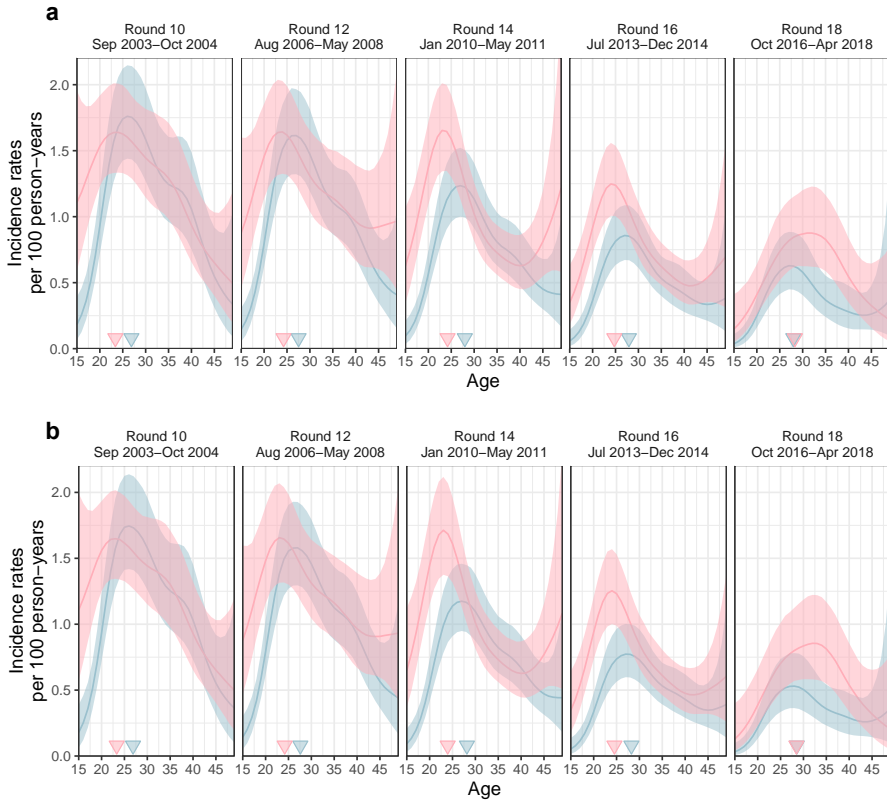

**Supplementary Fig. S4: Comparison of incidence rate estimated on data containing all communities and data subset to 28 continuously surveyed communities** (a) Mean and 95% uncertainty ranges of longitudinal age-specific incidence rates estimated on data from all communities surveyed (b) Same using data subset to 28 continuously surveyed communities.

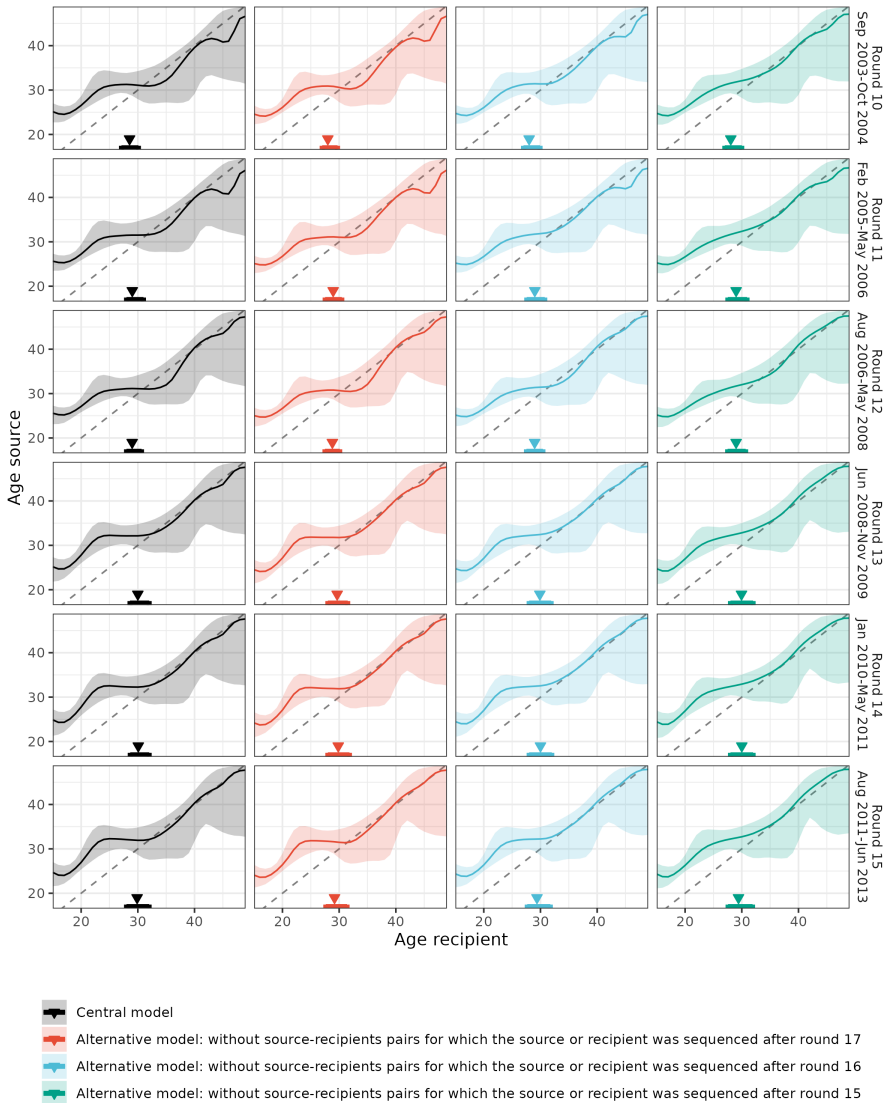

**Supplementary Fig. S5: Sensitivity in estimating the age of transmitting partners to right censoring of likely transmission pairs.** Posterior median (line) and 95% credible interval (ribbon) of the age of male transmitting partners by the age of the infected female (x-axis) by survey round (row facet) for the central and sensitivity analyses (column facet). Median and 95% credible interval of the age of male transmitting partners across the age of the infected female is indicated with a triangle and an error bar.

S10 LIST OF TABLES

91

92 **S2 Supplementary Tables**

|                                                                                  | Census-eligible individuals | Participants | Participants with HIV | Participants with HIV and with measured viral load | Participants with HIV reporting to be ART naïve <sup>†</sup> | Participants with HIV and with unsuppressed virus <sup>‡</sup> | Participants with HIV and with virus ever deep-sequenced <sup>‡</sup> |
|----------------------------------------------------------------------------------|-----------------------------|--------------|-----------------------|----------------------------------------------------|--------------------------------------------------------------|----------------------------------------------------------------|-----------------------------------------------------------------------|
| <b>Round 10, September 26, 2003 - November 23, 2004; 28 communities surveyed</b> |                             |              |                       |                                                    |                                                              |                                                                |                                                                       |
| Total                                                                            | 11,976                      | 7,407        | 884                   | –                                                  | –                                                            | –                                                              | 115                                                                   |
| Female                                                                           | 6,299                       | 4,341        | 575                   | –                                                  | –                                                            | –                                                              | 60                                                                    |
| Age                                                                              |                             |              |                       |                                                    |                                                              |                                                                |                                                                       |
| 15-24                                                                            | 3,118                       | 1,768        | 131                   | –                                                  | –                                                            | –                                                              | 17                                                                    |
| 25-34                                                                            | 1,916                       | 1,538        | 280                   | –                                                  | –                                                            | –                                                              | 27                                                                    |
| 35-49                                                                            | 1,265                       | 1,035        | 164                   | –                                                  | –                                                            | –                                                              | 16                                                                    |
| Male                                                                             | 5,677                       | 3,066        | 309                   | –                                                  | –                                                            | –                                                              | 55                                                                    |
| Age                                                                              |                             |              |                       |                                                    |                                                              |                                                                |                                                                       |
| 15-24                                                                            | 2,672                       | 1,186        | 38                    | –                                                  | –                                                            | –                                                              | 9                                                                     |
| 25-34                                                                            | 1,845                       | 1,132        | 145                   | –                                                  | –                                                            | –                                                              | 27                                                                    |
| 35-49                                                                            | 1,160                       | 748          | 126                   | –                                                  | –                                                            | –                                                              | 19                                                                    |
| <b>Round 11, February 15, 2005 - June 30, 2006; 28 communities surveyed</b>      |                             |              |                       |                                                    |                                                              |                                                                |                                                                       |
| Total                                                                            | 12,528                      | 8,273        | 1,002                 | 884                                                | –                                                            | –                                                              | 176                                                                   |
| Female                                                                           | 6,644                       | 4,786        | 658                   | 568                                                | –                                                            | –                                                              | 97                                                                    |
| Age                                                                              |                             |              |                       |                                                    |                                                              |                                                                |                                                                       |
| 15-24                                                                            | 3,146                       | 1,818        | 141                   | 138                                                | –                                                            | –                                                              | 26                                                                    |
| 25-34                                                                            | 2,175                       | 1,842        | 323                   | 286                                                | –                                                            | –                                                              | 50                                                                    |
| 35-49                                                                            | 1,323                       | 1,126        | 194                   | 144                                                | –                                                            | –                                                              | 21                                                                    |
| Male                                                                             | 5,884                       | 3,487        | 344                   | 316                                                | –                                                            | –                                                              | 79                                                                    |
| Age                                                                              |                             |              |                       |                                                    |                                                              |                                                                |                                                                       |
| 15-24                                                                            | 2,670                       | 1,293        | 30                    | 30                                                 | –                                                            | –                                                              | 6                                                                     |
| 25-34                                                                            | 1,956                       | 1,290        | 160                   | 153                                                | –                                                            | –                                                              | 40                                                                    |
| 35-49                                                                            | 1,258                       | 904          | 154                   | 133                                                | –                                                            | –                                                              | 33                                                                    |
| <b>Round 12, August 30, 2006 - June 06, 2008; 28 communities surveyed</b>        |                             |              |                       |                                                    |                                                              |                                                                |                                                                       |
| Total                                                                            | 13,718                      | 8,752        | 1,105                 | 912                                                | –                                                            | –                                                              | 234                                                                   |
| Female                                                                           | 7,185                       | 5,047        | 746                   | 610                                                | –                                                            | –                                                              | 140                                                                   |
| Age                                                                              |                             |              |                       |                                                    |                                                              |                                                                |                                                                       |
| 15-24                                                                            | 3,331                       | 1,903        | 151                   | 149                                                | –                                                            | –                                                              | 37                                                                    |
| 25-34                                                                            | 2,416                       | 1,958        | 354                   | 297                                                | –                                                            | –                                                              | 67                                                                    |
| 35-49                                                                            | 1,438                       | 1,186        | 241                   | 164                                                | –                                                            | –                                                              | 36                                                                    |
| Male                                                                             | 6,533                       | 3,705        | 359                   | 302                                                | –                                                            | –                                                              | 94                                                                    |
| Age                                                                              |                             |              |                       |                                                    |                                                              |                                                                |                                                                       |
| 15-24                                                                            | 2,866                       | 1,426        | 26                    | 25                                                 | –                                                            | –                                                              | 8                                                                     |
| 25-34                                                                            | 2,200                       | 1,305        | 168                   | 156                                                | –                                                            | –                                                              | 50                                                                    |
| 35-49                                                                            | 1,467                       | 974          | 165                   | 121                                                | –                                                            | –                                                              | 36                                                                    |
| <b>Round 13, June 17, 2008 - July 12, 2009; 28 communities surveyed</b>          |                             |              |                       |                                                    |                                                              |                                                                |                                                                       |
| Total                                                                            | 13,433                      | 8,718        | 1,160                 | 900                                                | –                                                            | –                                                              | 369                                                                   |
| Female                                                                           | 7,086                       | 4,975        | 760                   | 580                                                | –                                                            | –                                                              | 204                                                                   |
| Age                                                                              |                             |              |                       |                                                    |                                                              |                                                                |                                                                       |
| 15-24                                                                            | 3,160                       | 1,736        | 128                   | 124                                                | –                                                            | –                                                              | 45                                                                    |
| 25-34                                                                            | 2,379                       | 1,946        | 347                   | 278                                                | –                                                            | –                                                              | 99                                                                    |
| 35-49                                                                            | 1,547                       | 1,293        | 285                   | 178                                                | –                                                            | –                                                              | 60                                                                    |
| Male                                                                             | 6,347                       | 3,743        | 400                   | 320                                                | –                                                            | –                                                              | 165                                                                   |
| Age                                                                              |                             |              |                       |                                                    |                                                              |                                                                |                                                                       |
| 15-24                                                                            | 2,749                       | 1,397        | 32                    | 31                                                 | –                                                            | –                                                              | 19                                                                    |
| 25-34                                                                            | 2,042                       | 1,275        | 177                   | 160                                                | –                                                            | –                                                              | 82                                                                    |
| 35-49                                                                            | 1,556                       | 1,071        | 191                   | 129                                                | –                                                            | –                                                              | 64                                                                    |
| <b>Round 14, January 18, 2010 - June 21, 2011; 28 communities surveyed</b>       |                             |              |                       |                                                    |                                                              |                                                                |                                                                       |
| Total                                                                            | 14,828                      | 9,663        | 1,313                 | 964                                                | –                                                            | –                                                              | 602                                                                   |
| Female                                                                           | 7,766                       | 5,430        | 869                   | 615                                                | –                                                            | –                                                              | 341                                                                   |
| Age                                                                              |                             |              |                       |                                                    |                                                              |                                                                |                                                                       |
| 15-24                                                                            | 3,376                       | 1,877        | 134                   | 125                                                | –                                                            | –                                                              | 71                                                                    |
| 25-34                                                                            | 2,633                       | 2,084        | 379                   | 290                                                | –                                                            | –                                                              | 167                                                                   |
| 35-49                                                                            | 1,757                       | 1,469        | 356                   | 200                                                | –                                                            | –                                                              | 103                                                                   |
| Male                                                                             | 7,062                       | 4,233        | 444                   | 349                                                | –                                                            | –                                                              | 261                                                                   |
| Age                                                                              |                             |              |                       |                                                    |                                                              |                                                                |                                                                       |
| 15-24                                                                            | 2,963                       | 1,617        | 40                    | 38                                                 | –                                                            | –                                                              | 31                                                                    |
| 25-34                                                                            | 2,276                       | 1,398        | 185                   | 163                                                | –                                                            | –                                                              | 120                                                                   |
| 35-49                                                                            | 1,823                       | 1,218        | 219                   | 148                                                | –                                                            | –                                                              | 110                                                                   |

<sup>†</sup> Unsuppressed virus was defined as a plasma viral load measurement above 1000 copies/mL plasma blood. In R10, participants were not asked about ART status and viral loads were not measured. In R11-R14, participants reported their ART status and viral loads were not measured. In R15, participants reported both their ART status and a subset of viral loads were measured. In R16-R18, participants reported both their ART status and viral loads were measured comprehensively in participants with HIV. <sup>‡</sup> Samples were selected for deep-sequencing from participants who had no viral load measured and reported being ART-naïve or participants with viral load above 1,000 copies/mL plasma. Individuals participated across rounds, so for individuals participating in a given round, samples for sequencing could also be obtained in other rounds and we tabulate the proportion of participants ever deep-sequenced. Individuals with virus ever deep-sequenced were defined as HIV-positive individuals with deep-sequence output meeting minimum quality criteria, see Methods.

## Supplementary Table S1: Characteristics of the RCCS study population.

|                                                                                  | Census-eligible individuals | Participants | Participants with HIV | Participants with HIV and with measured viral load | Participants with HIV reporting to be ART naive <sup>†</sup> | Participants with HIV and with unsuppressed virus <sup>‡</sup> | Participants with HIV and with virus ever deep-sequenced <sup>‡</sup> |
|----------------------------------------------------------------------------------|-----------------------------|--------------|-----------------------|----------------------------------------------------|--------------------------------------------------------------|----------------------------------------------------------------|-----------------------------------------------------------------------|
| <b>Round 15, August 10, 2011 - July 05, 2013; 33 communities surveyed</b>        |                             |              |                       |                                                    |                                                              |                                                                |                                                                       |
| Total                                                                            | 20,806                      | 13,589       | 1,944                 | 1,331                                              | 207                                                          | 367                                                            | 1,086                                                                 |
| Female                                                                           | 10,782                      | 7,538        | 1,287                 | 844                                                | 122                                                          | 232                                                            | 637                                                                   |
| Age                                                                              |                             |              |                       |                                                    |                                                              |                                                                |                                                                       |
| 15-24                                                                            | 4,751                       | 2,742        | 217                   | 186                                                | 23                                                           | 31                                                             | 157                                                                   |
| 25-34                                                                            | 3,631                       | 2,825        | 568                   | 405                                                | 64                                                           | 101                                                            | 307                                                                   |
| 35-49                                                                            | 2,400                       | 1,971        | 502                   | 253                                                | 35                                                           | 100                                                            | 173                                                                   |
| Male                                                                             | 10,024                      | 6,051        | 657                   | 487                                                | 85                                                           | 135                                                            | 449                                                                   |
| Age                                                                              |                             |              |                       |                                                    |                                                              |                                                                |                                                                       |
| 15-24                                                                            | 4,150                       | 2,368        | 68                    | 58                                                 | 10                                                           | 11                                                             | 54                                                                    |
| 25-34                                                                            | 3,243                       | 1,955        | 260                   | 218                                                | 41                                                           | 57                                                             | 208                                                                   |
| 35-49                                                                            | 2,631                       | 1,728        | 329                   | 211                                                | 34                                                           | 67                                                             | 187                                                                   |
| <b>Round 16, July 08, 2013 - January 30, 2015; 35 communities surveyed</b>       |                             |              |                       |                                                    |                                                              |                                                                |                                                                       |
| Total                                                                            | 21,887                      | 14,072       | 1,875                 | 868                                                | 671                                                          | 1,829                                                          | 893                                                                   |
| Female                                                                           | 11,346                      | 7,816        | 1,255                 | 537                                                | 390                                                          | 1,224                                                          | 521                                                                   |
| Age                                                                              |                             |              |                       |                                                    |                                                              |                                                                |                                                                       |
| 15-24                                                                            | 5,089                       | 2,891        | 194                   | 129                                                | 97                                                           | 189                                                            | 83                                                                    |
| 25-34                                                                            | 3,547                       | 2,669        | 502                   | 238                                                | 175                                                          | 486                                                            | 249                                                                   |
| 35-49                                                                            | 2,710                       | 2,256        | 559                   | 170                                                | 118                                                          | 549                                                            | 189                                                                   |
| Male                                                                             | 10,541                      | 6,256        | 620                   | 331                                                | 281                                                          | 605                                                            | 372                                                                   |
| Age                                                                              |                             |              |                       |                                                    |                                                              |                                                                |                                                                       |
| 15-24                                                                            | 4,436                       | 2,462        | 50                    | 40                                                 | 34                                                           | 47                                                             | 35                                                                    |
| 25-34                                                                            | 3,241                       | 1,883        | 219                   | 141                                                | 123                                                          | 212                                                            | 155                                                                   |
| 35-49                                                                            | 2,864                       | 1,911        | 351                   | 150                                                | 124                                                          | 346                                                            | 182                                                                   |
| <b>Round 17, February 23, 2015 - September 02, 2016; 35 communities surveyed</b> |                             |              |                       |                                                    |                                                              |                                                                |                                                                       |
| Total                                                                            | 22,929                      | 15,093       | 2,015                 | 646                                                | 514                                                          | 2,004                                                          | 934                                                                   |
| Female                                                                           | 11,990                      | 8,377        | 1,390                 | 408                                                | 304                                                          | 1,384                                                          | 554                                                                   |
| Age                                                                              |                             |              |                       |                                                    |                                                              |                                                                |                                                                       |
| 15-24                                                                            | 5,393                       | 3,035        | 205                   | 94                                                 | 84                                                           | 204                                                            | 97                                                                    |
| 25-34                                                                            | 3,544                       | 2,723        | 529                   | 194                                                | 147                                                          | 525                                                            | 250                                                                   |
| 35-49                                                                            | 3,053                       | 2,619        | 656                   | 120                                                | 73                                                           | 655                                                            | 207                                                                   |
| Male                                                                             | 10,939                      | 6,716        | 625                   | 238                                                | 210                                                          | 620                                                            | 380                                                                   |
| Age                                                                              |                             |              |                       |                                                    |                                                              |                                                                |                                                                       |
| 15-24                                                                            | 4,677                       | 2,662        | 41                    | 28                                                 | 26                                                           | 40                                                             | 31                                                                    |
| 25-34                                                                            | 3,121                       | 1,912        | 208                   | 102                                                | 91                                                           | 206                                                            | 139                                                                   |
| 35-49                                                                            | 3,141                       | 2,142        | 376                   | 108                                                | 93                                                           | 374                                                            | 210                                                                   |
| <b>Round 18, October 03, 2016 - May 22, 2018; 35 communities surveyed</b>        |                             |              |                       |                                                    |                                                              |                                                                |                                                                       |
| Total                                                                            | 23,269                      | 15,053       | 1,860                 | 432                                                | 375                                                          | 1,850                                                          | 849                                                                   |
| Female                                                                           | 12,193                      | 8,331        | 1,275                 | 263                                                | 206                                                          | 1,271                                                          | 492                                                                   |
| Age                                                                              |                             |              |                       |                                                    |                                                              |                                                                |                                                                       |
| 15-24                                                                            | 5,484                       | 3,049        | 158                   | 72                                                 | 63                                                           | 158                                                            | 80                                                                    |
| 25-34                                                                            | 3,472                       | 2,592        | 461                   | 117                                                | 95                                                           | 457                                                            | 208                                                                   |
| 35-49                                                                            | 3,237                       | 2,690        | 656                   | 74                                                 | 48                                                           | 656                                                            | 204                                                                   |
| Male                                                                             | 11,076                      | 6,722        | 585                   | 169                                                | 169                                                          | 579                                                            | 357                                                                   |
| Age                                                                              |                             |              |                       |                                                    |                                                              |                                                                |                                                                       |
| 15-24                                                                            | 4,739                       | 2,671        | 38                    | 22                                                 | 24                                                           | 36                                                             | 27                                                                    |
| 25-34                                                                            | 3,077                       | 1,850        | 183                   | 79                                                 | 78                                                           | 183                                                            | 128                                                                   |
| 35-49                                                                            | 3,260                       | 2,201        | 364                   | 68                                                 | 67                                                           | 360                                                            | 202                                                                   |

<sup>†</sup> Unsuppressed virus was defined as a plasma viral load measurement above 1000 copies/mL plasma blood. In R10, participants were not asked about ART status and viral loads were not measured. In R11-R14, participants reported their ART status and viral loads were not measured. In R15, participants reported both their ART status and a subset of viral loads were measured. In R16-R18, participants reported both their ART status and viral loads were measured comprehensively in participants with HIV. <sup>‡</sup> Samples were selected for deep-sequencing from participants who had no viral load measured and reported being ART-naïve or participants with viral load above 1,000 copies/mL plasma. Individuals participated across rounds, so for individuals participating in a given round, samples for sequencing could also be obtained in other rounds and we tabulate the proportion of participants ever deep-sequenced. Individuals with virus ever deep-sequenced were defined as HIV-positive individuals with deep-sequence output meeting minimum quality criteria, see Methods.

## Supplementary Table S1: Characteristics of the RCCS study population (continued).

| Community Identifier <sup>†</sup> | Part of RCCS |          |          |          |          |          |          |          |          |
|-----------------------------------|--------------|----------|----------|----------|----------|----------|----------|----------|----------|
|                                   | Round 10     | Round 11 | Round 12 | Round 13 | Round 14 | Round 15 | Round 16 | Round 17 | Round 18 |
| i-01                              | Yes          | Yes      | Yes      | Yes      | Yes      | Yes      | Yes      | Yes      | Yes      |
| i-02                              | Yes          | Yes      | Yes      | Yes      | Yes      | Yes      | Yes      | Yes      | Yes      |
| i-03                              | Yes          | Yes      | Yes      | Yes      | Yes      | Yes      | Yes      | Yes      | Yes      |
| i-04                              | Yes          | Yes      | Yes      | Yes      | Yes      | Yes      | Yes      | Yes      | Yes      |
| i-05                              | Yes          | Yes      | Yes      | Yes      | Yes      | Yes      | Yes      | Yes      | Yes      |
| i-06                              | Yes          | Yes      | Yes      | Yes      | Yes      | Yes      | Yes      | Yes      | Yes      |
| i-07                              | Yes          | Yes      | Yes      | Yes      | Yes      | Yes      | Yes      | Yes      | Yes      |
| i-08                              | Yes          | Yes      | Yes      | Yes      | Yes      | Yes      | Yes      | Yes      | Yes      |
| i-09                              | No           | No       | No       | No       | No       | Yes      | Yes      | Yes      | Yes      |
| i-10                              | Yes          | Yes      | Yes      | Yes      | Yes      | Yes      | Yes      | Yes      | Yes      |
| i-11                              | Yes          | Yes      | Yes      | Yes      | Yes      | Yes      | Yes      | Yes      | Yes      |
| i-12                              | Yes          | Yes      | Yes      | Yes      | Yes      | Yes      | Yes      | Yes      | Yes      |
| i-13                              | No           | No       | No       | No       | No       | No       | Yes      | Yes      | Yes      |
| i-14                              | No           | No       | No       | No       | No       | Yes      | Yes      | Yes      | Yes      |
| i-15                              | Yes          | Yes      | Yes      | Yes      | Yes      | Yes      | Yes      | Yes      | Yes      |
| i-16                              | Yes          | Yes      | Yes      | Yes      | Yes      | Yes      | Yes      | Yes      | Yes      |
| i-17                              | Yes          | Yes      | Yes      | Yes      | Yes      | Yes      | Yes      | Yes      | Yes      |
| i-18                              | No           | No       | No       | No       | No       | No       | Yes      | Yes      | Yes      |
| i-19                              | Yes          | Yes      | Yes      | Yes      | Yes      | Yes      | Yes      | Yes      | Yes      |
| i-20                              | No           | No       | No       | No       | No       | Yes      | No       | No       | No       |
| i-21                              | No           | No       | No       | No       | No       | No       | Yes      | Yes      | Yes      |
| i-22                              | Yes          | Yes      | Yes      | Yes      | Yes      | Yes      | Yes      | Yes      | Yes      |
| i-23                              | Yes          | Yes      | Yes      | Yes      | Yes      | Yes      | Yes      | Yes      | Yes      |
| i-24                              | Yes          | Yes      | Yes      | Yes      | Yes      | Yes      | Yes      | Yes      | Yes      |
| i-25                              | Yes          | Yes      | Yes      | Yes      | Yes      | Yes      | Yes      | Yes      | Yes      |
| i-26                              | Yes          | Yes      | Yes      | Yes      | Yes      | Yes      | Yes      | Yes      | Yes      |
| i-27                              | Yes          | Yes      | Yes      | Yes      | Yes      | Yes      | Yes      | Yes      | Yes      |
| i-28                              | Yes          | Yes      | Yes      | Yes      | Yes      | Yes      | Yes      | Yes      | Yes      |
| i-29                              | Yes          | Yes      | Yes      | Yes      | Yes      | Yes      | Yes      | Yes      | Yes      |
| i-30                              | Yes          | Yes      | Yes      | Yes      | Yes      | Yes      | Yes      | Yes      | Yes      |
| i-31                              | Yes          | Yes      | Yes      | Yes      | Yes      | Yes      | Yes      | Yes      | Yes      |
| i-32                              | No           | No       | No       | No       | No       | Yes      | Yes      | Yes      | Yes      |
| i-33                              | No           | No       | No       | No       | No       | Yes      | Yes      | Yes      | Yes      |
| i-34                              | Yes          | Yes      | Yes      | Yes      | Yes      | Yes      | Yes      | Yes      | Yes      |
| i-35                              | Yes          | Yes      | Yes      | Yes      | Yes      | Yes      | Yes      | Yes      | Yes      |
| i-36                              | Yes          | Yes      | Yes      | Yes      | Yes      | Yes      | Yes      | Yes      | Yes      |

<sup>†</sup> Three pairs of geographically close areas in peri-urban settings were merged into three communities.

### Supplementary Table S2: Communities surveyed by RCCS in rounds 10-18.



## S14 LIST OF TABLES

|                                                                                  | Incidence cohort <sup>†</sup> | Person-years <sup>‡</sup>       | Incidence events <sup>§</sup> | Incidence rate estimate per 100 PY <sup>¶</sup> |
|----------------------------------------------------------------------------------|-------------------------------|---------------------------------|-------------------------------|-------------------------------------------------|
| <b>Round 10, September 26, 2003 - November 23, 2004; 28 communities surveyed</b> |                               |                                 |                               |                                                 |
| Total                                                                            | 7,372                         | 9,464.33 [9,448.40-9,481.02]    | 122.0 [112.22-130.77]         | 1.32 [1.27-1.37]                                |
| Female                                                                           | 4,055                         | 5,213.53 [5,201.59-5,224.77]    | 71.0 [61.22-77.00]            | 1.37 [1.30-1.45]                                |
| Age                                                                              |                               |                                 |                               |                                                 |
| 15-24                                                                            | 1,706                         | 1,938.12 [1,928.82-1,944.71]    | 32.0 [28.22-37.77]            | 1.53 [1.40-1.68]                                |
| 25-34                                                                            | 1,440                         | 2,025.25 [2,015.02-2,032.45]    | 26.0 [21.00-34.77]            | 1.50 [1.38-1.63]                                |
| 35-49                                                                            | 909                           | 1,251.31 [1,247.69-1,255.27]    | 11.0 [8.00-13.77]             | 0.90 [0.81-1.01]                                |
| Male                                                                             | 3,317                         | 4,252.08 [4,237.69-4,264.78]    | 51.0 [45.22-57.32]            | 1.26 [1.19-1.33]                                |
| Age                                                                              |                               |                                 |                               |                                                 |
| 15-24                                                                            | 1,328                         | 1,522.78 [1,514.43-1,527.77]    | 12.0 [7.22-14.77]             | 1.04 [0.94-1.15]                                |
| 25-34                                                                            | 1,254                         | 1,718.06 [1,708.34-1,725.71]    | 29.0 [24.23-34.77]            | 1.61 [1.48-1.75]                                |
| 35-49                                                                            | 735                           | 1,011.40 [1,006.45-1,015.40]    | 10.0 [8.00-13.00]             | 1.00 [0.89-1.11]                                |
| <b>Round 11, February 15, 2005 - June 30, 2006; 28 communities surveyed</b>      |                               |                                 |                               |                                                 |
| Total                                                                            | 7,787                         | 11,484.46 [11,465.55-11,505.89] | 144.0 [131.45-154.77]         | 1.29 [1.23-1.34]                                |
| Female                                                                           | 4,291                         | 6,261.90 [6,247.27-6,278.78]    | 84.0 [76.22-91.00]            | 1.36 [1.27-1.44]                                |
| Age                                                                              |                               |                                 |                               |                                                 |
| 15-24                                                                            | 1,646                         | 2,088.35 [2,078.11-2,095.10]    | 31.0 [25.45-37.00]            | 1.48 [1.34-1.64]                                |
| 25-34                                                                            | 1,667                         | 2,654.38 [2,644.12-2,664.53]    | 39.0 [34.00-43.77]            | 1.46 [1.34-1.59]                                |
| 35-49                                                                            | 978                           | 1,519.83 [1,515.14-1,526.38]    | 13.0 [11.00-17.00]            | 1.00 [0.90-1.11]                                |
| Male                                                                             | 3,496                         | 5,222.93 [5,209.14-5,243.01]    | 60.0 [51.45-65.00]            | 1.20 [1.14-1.27]                                |
| Age                                                                              |                               |                                 |                               |                                                 |
| 15-24                                                                            | 1,323                         | 1,781.07 [1,774.24-1,787.04]    | 17.0 [12.00-20.00]            | 0.97 [0.88-1.06]                                |
| 25-34                                                                            | 1,356                         | 2,145.73 [2,135.78-2,156.34]    | 31.0 [26.23-36.77]            | 1.55 [1.43-1.69]                                |
| 35-49                                                                            | 817                           | 1,296.59 [1,291.00-1,302.85]    | 11.0 [8.00-14.77]             | 0.95 [0.86-1.06]                                |
| <b>Round 12, August 30, 2006 - June 06, 2008; 28 communities surveyed</b>        |                               |                                 |                               |                                                 |
| Total                                                                            | 8,480                         | 12,396.23 [12,369.28-12,422.54] | 168.0 [151.12-177.33]         | 1.21 [1.16-1.28]                                |
| Female                                                                           | 4,598                         | 6,648.49 [6,632.13-6,668.15]    | 95.0 [84.67-101.00]           | 1.31 [1.24-1.43]                                |
| Age                                                                              |                               |                                 |                               |                                                 |
| 15-24                                                                            | 1,669                         | 2,100.25 [2,091.86-2,108.29]    | 31.0 [25.00-36.77]            | 1.44 [1.29-1.62]                                |
| 25-34                                                                            | 1,869                         | 2,883.98 [2,869.79-2,897.39]    | 45.0 [39.23-52.77]            | 1.39 [1.27-1.54]                                |
| 35-49                                                                            | 1,060                         | 1,666.57 [1,659.44-1,673.22]    | 19.0 [16.00-22.00]            | 1.02 [0.90-1.18]                                |
| Male                                                                             | 3,882                         | 5,746.59 [5,732.78-5,759.56]    | 72.0 [65.22-79.00]            | 1.09 [1.02-1.17]                                |
| Age                                                                              |                               |                                 |                               |                                                 |
| 15-24                                                                            | 1,460                         | 1,990.10 [1,984.61-1,996.47]    | 15.0 [10.22-17.00]            | 0.83 [0.75-0.92]                                |
| 25-34                                                                            | 1,474                         | 2,246.22 [2,235.56-2,252.48]    | 38.0 [32.00-44.00]            | 1.46 [1.34-1.59]                                |
| 35-49                                                                            | 948                           | 1,511.44 [1,503.26-1,516.12]    | 19.0 [16.23-23.77]            | 0.88 [0.80-1.00]                                |
| <b>Round 13, June 17, 2008 - July 12, 2009; 28 communities surveyed</b>          |                               |                                 |                               |                                                 |
| Total                                                                            | 8,770                         | 11,823.39 [11,802.83-11,845.07] | 136.0 [125.00-145.55]         | 1.08 [1.04-1.15]                                |
| Female                                                                           | 4,728                         | 6,331.90 [6,313.25-6,348.15]    | 83.0 [73.45-89.00]            | 1.21 [1.15-1.33]                                |
| Age                                                                              |                               |                                 |                               |                                                 |
| 15-24                                                                            | 1,624                         | 1,942.24 [1,932.52-1,949.30]    | 29.0 [25.00-35.77]            | 1.38 [1.26-1.54]                                |
| 25-34                                                                            | 1,948                         | 2,723.50 [2,708.26-2,732.27]    | 37.0 [32.00-43.55]            | 1.27 [1.17-1.41]                                |
| 35-49                                                                            | 1,156                         | 1,667.46 [1,661.12-1,673.50]    | 16.0 [12.00-21.77]            | 0.90 [0.81-1.06]                                |
| Male                                                                             | 4,042                         | 5,490.33 [5,477.08-5,500.21]    | 52.0 [47.23-59.55]            | 0.94 [0.89-1.02]                                |
| Age                                                                              |                               |                                 |                               |                                                 |
| 15-24                                                                            | 1,491                         | 1,900.09 [1,893.07-1,905.26]    | 17.0 [13.23-21.55]            | 0.69 [0.63-0.77]                                |
| 25-34                                                                            | 1,475                         | 2,004.64 [1,996.54-2,012.04]    | 23.0 [18.00-27.77]            | 1.30 [1.20-1.43]                                |
| 35-49                                                                            | 1,076                         | 1,586.25 [1,578.36-1,593.72]    | 13.0 [10.00-16.77]            | 0.78 [0.70-0.89]                                |
| <b>Round 14, January 18, 2010 - June 21, 2011; 28 communities surveyed</b>       |                               |                                 |                               |                                                 |
| Total                                                                            | 9,290                         | 12,359.17 [12,344.41-12,374.39] | 107.5 [97.45-118.00]          | 0.93 [0.89-0.97]                                |
| Female                                                                           | 4,963                         | 6,624.63 [6,608.63-6,638.01]    | 63.0 [55.00-71.78]            | 1.07 [1.00-1.13]                                |
| Age                                                                              |                               |                                 |                               |                                                 |
| 15-24                                                                            | 1,706                         | 1,998.64 [1,991.11-2,007.00]    | 23.0 [19.00-30.00]            | 1.30 [1.17-1.43]                                |
| 25-34                                                                            | 1,999                         | 2,766.97 [2,761.12-2,775.18]    | 24.0 [15.68-30.55]            | 1.13 [1.03-1.22]                                |
| 35-49                                                                            | 1,258                         | 1,857.69 [1,850.32-1,863.26]    | 15.0 [11.00-19.00]            | 0.74 [0.66-0.82]                                |
| Male                                                                             | 4,327                         | 5,734.81 [5,725.76-5,744.10]    | 46.0 [39.23-50.00]            | 0.77 [0.73-0.82]                                |
| Age                                                                              |                               |                                 |                               |                                                 |
| 15-24                                                                            | 1,642                         | 1,988.89 [1,983.58-1,992.83]    | 14.0 [10.00-16.77]            | 0.55 [0.50-0.61]                                |
| 25-34                                                                            | 1,487                         | 1,999.30 [1,992.87-2,005.68]    | 22.0 [19.00-26.77]            | 1.11 [1.02-1.21]                                |
| 35-49                                                                            | 1,198                         | 1,747.16 [1,742.21-1,752.55]    | 9.0 [6.22-12.77]              | 0.65 [0.58-0.73]                                |

<sup>†</sup> Number of RCCS study participants who were HIV-negative at their first visit and had at least one subsequent follow-up visit.

<sup>‡</sup> Number of person-years of HIV acquisition risk. <sup>§</sup> Number of incidence events. The infection date was imputed at random to have occurred between the last negative and first positive survey visit dates, and the incidence event was attributed to the corresponding survey round 50 times. The range of the person-years and incidence events across the 50 data sets with imputed exposure times are presented. <sup>¶</sup> Estimated incidence rate per 100 person-years. The confidence interval of the estimated incidence rate incorporates both the variability of the estimation procedure and the data imputation procedure.

### Supplementary Table S3: Characteristics of the longitudinal HIV incidence cohort.

|                                                                                  | Incidence cohort <sup>†</sup> | Person-years <sup>‡</sup>       | Incidence events <sup>§</sup> | Incidence rate estimate per 100 PY <sup>¶</sup> |
|----------------------------------------------------------------------------------|-------------------------------|---------------------------------|-------------------------------|-------------------------------------------------|
| <b>Round 15, August 10, 2011 - July 05, 2013; 33 communities surveyed</b>        |                               |                                 |                               |                                                 |
| Total                                                                            | 10,441                        | 17,621.81 [17,596.06-17,643.04] | 140.0 [129.45-148.78]         | 0.79 [0.76-0.83]                                |
| Female                                                                           | 5,520                         | 9,227.87 [9,204.36-9,242.47]    | 87.0 [79.22-94.77]            | 0.94 [0.88-0.99]                                |
| Age                                                                              |                               |                                 |                               |                                                 |
| 15-24                                                                            | 1,892                         | 2,742.21 [2,728.96-2,752.62]    | 37.0 [31.23-43.77]            | 1.17 [1.05-1.30]                                |
| 25-34                                                                            | 2,184                         | 3,728.50 [3,713.89-3,735.50]    | 38.0 [34.00-42.77]            | 1.02 [0.92-1.10]                                |
| 35-49                                                                            | 1,444                         | 2,757.15 [2,750.51-2,765.25]    | 12.0 [9.23-15.77]             | 0.61 [0.54-0.68]                                |
| Male                                                                             | 4,921                         | 8,395.89 [8,383.12-8,406.96]    | 52.0 [47.23-60.00]            | 0.64 [0.60-0.67]                                |
| Age                                                                              |                               |                                 |                               |                                                 |
| 15-24                                                                            | 1,848                         | 2,842.07 [2,836.70-2,847.92]    | 11.0 [8.00-14.00]             | 0.45 [0.41-0.50]                                |
| 25-34                                                                            | 1,657                         | 2,865.12 [2,856.30-2,874.43]    | 31.0 [26.23-35.00]            | 0.92 [0.84-1.01]                                |
| 35-49                                                                            | 1,416                         | 2,687.98 [2,679.81-2,695.84]    | 11.0 [6.22-14.00]             | 0.52 [0.46-0.59]                                |
| <b>Round 16, July 08, 2013 - January 30, 2015; 35 communities surveyed</b>       |                               |                                 |                               |                                                 |
| Total                                                                            | 12,142                        | 16,633.57 [16,621.16-16,648.28] | 108.5 [98.45-116.78]          | 0.66 [0.63-0.70]                                |
| Female                                                                           | 6,380                         | 8,745.06 [8,737.02-8,758.26]    | 72.5 [64.22-80.78]            | 0.80 [0.75-0.86]                                |
| Age                                                                              |                               |                                 |                               |                                                 |
| 15-24                                                                            | 2,236                         | 2,699.66 [2,693.50-2,703.90]    | 24.5 [21.23-31.55]            | 0.89 [0.80-0.99]                                |
| 25-34                                                                            | 2,328                         | 3,202.15 [3,195.15-3,209.33]    | 33.0 [27.00-38.77]            | 0.94 [0.85-1.04]                                |
| 35-49                                                                            | 1,816                         | 2,843.90 [2,839.95-2,847.65]    | 15.0 [11.22-18.00]            | 0.55 [0.49-0.62]                                |
| Male                                                                             | 5,762                         | 7,888.21 [7,881.14-7,895.54]    | 35.0 [31.00-39.00]            | 0.51 [0.48-0.55]                                |
| Age                                                                              |                               |                                 |                               |                                                 |
| 15-24                                                                            | 2,206                         | 2,803.63 [2,801.36-2,806.94]    | 8.0 [7.00-10.00]              | 0.37 [0.32-0.41]                                |
| 25-34                                                                            | 1,813                         | 2,501.71 [2,496.99-2,507.33]    | 17.0 [13.00-20.00]            | 0.77 [0.68-0.84]                                |
| 35-49                                                                            | 1,743                         | 2,582.08 [2,578.79-2,588.18]    | 9.0 [6.22-14.00]              | 0.43 [0.37-0.49]                                |
| <b>Round 17, February 23, 2015 - September 02, 2016; 35 communities surveyed</b> |                               |                                 |                               |                                                 |
| Total                                                                            | 12,738                        | 17,437.70 [17,422.40-17,448.35] | 89.5 [80.22-95.78]            | 0.56 [0.53-0.59]                                |
| Female                                                                           | 6,680                         | 9,116.75 [9,106.85-9,127.51]    | 57.0 [48.45-61.77]            | 0.68 [0.64-0.72]                                |
| Age                                                                              |                               |                                 |                               |                                                 |
| 15-24                                                                            | 2,327                         | 2,796.00 [2,790.86-2,799.37]    | 11.0 [8.00-13.77]             | 0.62 [0.56-0.70]                                |
| 25-34                                                                            | 2,286                         | 3,187.45 [3,182.16-3,194.41]    | 28.0 [23.23-32.00]            | 0.87 [0.80-0.95]                                |
| 35-49                                                                            | 2,067                         | 3,133.05 [3,127.18-3,138.08]    | 17.0 [15.00-21.77]            | 0.53 [0.48-0.59]                                |
| Male                                                                             | 6,058                         | 8,321.01 [8,312.47-8,328.62]    | 32.0 [27.45-36.00]            | 0.43 [0.40-0.46]                                |
| Age                                                                              |                               |                                 |                               |                                                 |
| 15-24                                                                            | 2,353                         | 3,012.95 [3,009.30-3,015.97]    | 9.0 [8.00-11.00]              | 0.30 [0.27-0.35]                                |
| 25-34                                                                            | 1,796                         | 2,485.06 [2,479.65-2,490.25]    | 14.0 [10.22-18.00]            | 0.65 [0.58-0.73]                                |
| 35-49                                                                            | 1,909                         | 2,823.11 [2,818.49-2,830.23]    | 9.0 [5.22-12.00]              | 0.36 [0.30-0.42]                                |
| <b>Round 18, October 03, 2016 - May 22, 2018; 35 communities surveyed</b>        |                               |                                 |                               |                                                 |
| Total                                                                            | 12,217                        | 17,992.52 [17,982.46-18,005.50] | 89.0 [83.00-97.78]            | 0.50 [0.47-0.54]                                |
| Female                                                                           | 6,425                         | 9,624.65 [9,617.33-9,633.49]    | 57.0 [53.00-65.00]            | 0.62 [0.56-0.68]                                |
| Age                                                                              |                               |                                 |                               |                                                 |
| 15-24                                                                            | 2,174                         | 2,703.74 [2,699.61-2,706.79]    | 12.0 [10.00-13.77]            | 0.42 [0.35-0.51]                                |
| 25-34                                                                            | 2,125                         | 3,249.56 [3,241.74-3,255.03]    | 26.0 [24.00-30.77]            | 0.85 [0.75-0.96]                                |
| 35-49                                                                            | 2,126                         | 3,671.67 [3,665.44-3,676.22]    | 19.0 [16.23-23.00]            | 0.56 [0.47-0.65]                                |
| Male                                                                             | 5,792                         | 8,368.03 [8,361.41-8,377.69]    | 32.0 [30.00-35.00]            | 0.37 [0.34-0.40]                                |
| Age                                                                              |                               |                                 |                               |                                                 |
| 15-24                                                                            | 2,229                         | 2,895.16 [2,891.38-2,899.31]    | 10.0 [8.00-12.00]             | 0.26 [0.22-0.31]                                |
| 25-34                                                                            | 1,664                         | 2,496.56 [2,493.55-2,501.84]    | 14.0 [12.00-17.00]            | 0.56 [0.49-0.64]                                |
| 35-49                                                                            | 1,899                         | 2,976.37 [2,972.27-2,980.31]    | 8.0 [6.00-11.00]              | 0.31 [0.25-0.37]                                |

<sup>†</sup> Number of RCCS study participants who were HIV-negative at their first visit and had at least one subsequent follow-up visit.

<sup>‡</sup> Number of person-years of HIV acquisition risk. <sup>§</sup> Number of incidence events. The infection date was imputed at random to

have occurred between the last negative and first positive survey visit dates, and the incidence event was attributed to the

corresponding survey round 50 times. The range of the person-years and incidence events across the 50 data sets with imputed

exposure times are presented. <sup>¶</sup> Estimated incidence rate per 100 person-years. The confidence interval of the estimated incidence

rate incorporates both the variability of the estimation procedure and the data imputation procedure.

### Supplementary Table S3: Characteristics of the longitudinal HIV incidence cohort (continued).

|                                                                                                | Akaike information criterion (AIC) |                                  | % observations within 95% prediction intervals |                                |                                |
|------------------------------------------------------------------------------------------------|------------------------------------|----------------------------------|------------------------------------------------|--------------------------------|--------------------------------|
|                                                                                                | Men                                | Women                            | Men                                            | Women                          | All                            |
| Central model                                                                                  | <b>8,032</b><br>[7,937-8,140]      | <b>11,579</b><br>[11,508-11,688] | 98.77%<br>[97.78-99.68]                        | <b>98.82%</b><br>[97.78-99.68] | <b>98.80%</b><br>[98.10-99.49] |
| Alternative models                                                                             |                                    |                                  |                                                |                                |                                |
| with 2D GP over age and survey round                                                           | 8,033<br>[7,938-8,141]             | 11,580<br>[11,511-11,690]        | <b>98.84%</b><br>[98.10-99.68]                 | 93.32%<br>[91.18-95.10]        | 96.08%<br>[94.96-96.95]        |
| without interaction term between age and survey round                                          | 8,033<br>[7,938-8,142]             | 11,592<br>[11,521-11,706]        | 98.79%<br>[97.78-99.68]                        | 93.83%<br>[92.06-95.24]        | 96.31%<br>[95.27-97.23]        |
| with 2D GP over age and survey round and without interaction term between age and survey round | 8,035<br>[7,939-8,143]             | 11,590<br>[11,517-11,701]        | 98.82%<br>[97.78-99.68]                        | 93.45%<br>[90.94-95.24]        | 96.13%<br>[94.99-97.23]        |

**Supplementary Table S4: Model comparison for estimating longitudinal, age-specific incidence rates.**

|                                                                                  | Participants with HIV | Participants with HIV >1,000 cps/mL or reporting no ART use if viral load was not measured | Participants with HIV and with virus ever deep-sequenced with Illumina MiSeq in PANGEA-HIV 1 <sup>†</sup> | Participants with HIV and with virus ever deep-sequenced with Illumina HiSeq in PANGEA-HIV 1 <sup>†</sup> | Participants with HIV and with virus ever deep-sequenced with Illumina NovaSeq in PANGEA-HIV 2 <sup>‡</sup> | Participants with HIV and with virus ever deep-sequenced | Sequence sampling coverage of participants with HIV |
|----------------------------------------------------------------------------------|-----------------------|--------------------------------------------------------------------------------------------|-----------------------------------------------------------------------------------------------------------|-----------------------------------------------------------------------------------------------------------|-------------------------------------------------------------------------------------------------------------|----------------------------------------------------------|-----------------------------------------------------|
|                                                                                  | (n)                   | (n)                                                                                        | (n)                                                                                                       | (n)                                                                                                       | (n)                                                                                                         | (n)                                                      | (%)                                                 |
| <b>Round 10, September 26, 2003 - November 23, 2004; 28 communities surveyed</b> |                       |                                                                                            |                                                                                                           |                                                                                                           |                                                                                                             |                                                          |                                                     |
| Total                                                                            | 884                   | 884                                                                                        | 54                                                                                                        | 3                                                                                                         | 58                                                                                                          | 115                                                      | 13.01                                               |
| Female                                                                           | 575                   | 575                                                                                        | 25                                                                                                        | 2                                                                                                         | 33                                                                                                          | 60                                                       | 10.43                                               |
| Age                                                                              |                       |                                                                                            |                                                                                                           |                                                                                                           |                                                                                                             |                                                          |                                                     |
| 15-24                                                                            | 131                   | 131                                                                                        | 8                                                                                                         | 1                                                                                                         | 8                                                                                                           | 17                                                       | 12.98                                               |
| 25-34                                                                            | 280                   | 280                                                                                        | 9                                                                                                         | 0                                                                                                         | 18                                                                                                          | 27                                                       | 9.64                                                |
| 35-49                                                                            | 164                   | 164                                                                                        | 8                                                                                                         | 1                                                                                                         | 7                                                                                                           | 16                                                       | 9.76                                                |
| Male                                                                             | 309                   | 309                                                                                        | 29                                                                                                        | 1                                                                                                         | 25                                                                                                          | 55                                                       | 17.8                                                |
| Age                                                                              |                       |                                                                                            |                                                                                                           |                                                                                                           |                                                                                                             |                                                          |                                                     |
| 15-24                                                                            | 38                    | 38                                                                                         | 6                                                                                                         | 0                                                                                                         | 3                                                                                                           | 9                                                        | 23.68                                               |
| 25-34                                                                            | 145                   | 145                                                                                        | 12                                                                                                        | 1                                                                                                         | 14                                                                                                          | 27                                                       | 18.62                                               |
| 35-49                                                                            | 126                   | 126                                                                                        | 11                                                                                                        | 0                                                                                                         | 8                                                                                                           | 19                                                       | 15.08                                               |
| <b>Round 11, February 15, 2005 - June 30, 2006; 28 communities surveyed</b>      |                       |                                                                                            |                                                                                                           |                                                                                                           |                                                                                                             |                                                          |                                                     |
| Total                                                                            | 1002                  | 884                                                                                        | 80                                                                                                        | 3                                                                                                         | 93                                                                                                          | 176                                                      | 17.56                                               |
| Female                                                                           | 658                   | 568                                                                                        | 41                                                                                                        | 2                                                                                                         | 54                                                                                                          | 97                                                       | 14.74                                               |
| Age                                                                              |                       |                                                                                            |                                                                                                           |                                                                                                           |                                                                                                             |                                                          |                                                     |
| 15-24                                                                            | 141                   | 138                                                                                        | 8                                                                                                         | 1                                                                                                         | 17                                                                                                          | 26                                                       | 18.44                                               |
| 25-34                                                                            | 323                   | 286                                                                                        | 22                                                                                                        | 0                                                                                                         | 28                                                                                                          | 50                                                       | 15.48                                               |
| 35-49                                                                            | 194                   | 144                                                                                        | 11                                                                                                        | 1                                                                                                         | 9                                                                                                           | 21                                                       | 10.82                                               |
| Male                                                                             | 344                   | 316                                                                                        | 39                                                                                                        | 1                                                                                                         | 39                                                                                                          | 79                                                       | 22.97                                               |
| Age                                                                              |                       |                                                                                            |                                                                                                           |                                                                                                           |                                                                                                             |                                                          |                                                     |
| 15-24                                                                            | 30                    | 30                                                                                         | 4                                                                                                         | 0                                                                                                         | 2                                                                                                           | 6                                                        | 20                                                  |
| 25-34                                                                            | 160                   | 153                                                                                        | 20                                                                                                        | 1                                                                                                         | 19                                                                                                          | 40                                                       | 25                                                  |
| 35-49                                                                            | 154                   | 133                                                                                        | 15                                                                                                        | 0                                                                                                         | 18                                                                                                          | 33                                                       | 21.43                                               |
| <b>Round 12, August 30, 2006 - June 06, 2008; 28 communities surveyed</b>        |                       |                                                                                            |                                                                                                           |                                                                                                           |                                                                                                             |                                                          |                                                     |
| Total                                                                            | 1105                  | 912                                                                                        | 117                                                                                                       | 3                                                                                                         | 114                                                                                                         | 234                                                      | 21.18                                               |
| Female                                                                           | 746                   | 610                                                                                        | 63                                                                                                        | 2                                                                                                         | 75                                                                                                          | 140                                                      | 18.77                                               |
| Age                                                                              |                       |                                                                                            |                                                                                                           |                                                                                                           |                                                                                                             |                                                          |                                                     |
| 15-24                                                                            | 151                   | 149                                                                                        | 16                                                                                                        | 1                                                                                                         | 20                                                                                                          | 37                                                       | 24.5                                                |
| 25-34                                                                            | 354                   | 297                                                                                        | 31                                                                                                        | 0                                                                                                         | 36                                                                                                          | 67                                                       | 18.93                                               |
| 35-49                                                                            | 241                   | 164                                                                                        | 16                                                                                                        | 1                                                                                                         | 19                                                                                                          | 36                                                       | 14.94                                               |
| Male                                                                             | 359                   | 302                                                                                        | 54                                                                                                        | 1                                                                                                         | 39                                                                                                          | 94                                                       | 26.18                                               |
| Age                                                                              |                       |                                                                                            |                                                                                                           |                                                                                                           |                                                                                                             |                                                          |                                                     |
| 15-24                                                                            | 26                    | 25                                                                                         | 6                                                                                                         | 0                                                                                                         | 2                                                                                                           | 8                                                        | 30.77                                               |
| 25-34                                                                            | 168                   | 156                                                                                        | 28                                                                                                        | 1                                                                                                         | 21                                                                                                          | 50                                                       | 29.76                                               |
| 35-49                                                                            | 165                   | 121                                                                                        | 20                                                                                                        | 0                                                                                                         | 16                                                                                                          | 36                                                       | 21.82                                               |
| <b>Round 13, June 17, 2008 - July 12, 2009; 28 communities surveyed</b>          |                       |                                                                                            |                                                                                                           |                                                                                                           |                                                                                                             |                                                          |                                                     |
| Total                                                                            | 1160                  | 900                                                                                        | 179                                                                                                       | 3                                                                                                         | 187                                                                                                         | 369                                                      | 31.81                                               |
| Female                                                                           | 760                   | 580                                                                                        | 93                                                                                                        | 2                                                                                                         | 109                                                                                                         | 204                                                      | 26.84                                               |
| Age                                                                              |                       |                                                                                            |                                                                                                           |                                                                                                           |                                                                                                             |                                                          |                                                     |
| 15-24                                                                            | 128                   | 124                                                                                        | 22                                                                                                        | 1                                                                                                         | 22                                                                                                          | 45                                                       | 35.16                                               |
| 25-34                                                                            | 347                   | 278                                                                                        | 44                                                                                                        | 0                                                                                                         | 55                                                                                                          | 99                                                       | 28.53                                               |
| 35-49                                                                            | 285                   | 178                                                                                        | 27                                                                                                        | 1                                                                                                         | 32                                                                                                          | 60                                                       | 21.05                                               |
| Male                                                                             | 400                   | 320                                                                                        | 86                                                                                                        | 1                                                                                                         | 78                                                                                                          | 165                                                      | 41.25                                               |
| Age                                                                              |                       |                                                                                            |                                                                                                           |                                                                                                           |                                                                                                             |                                                          |                                                     |
| 15-24                                                                            | 32                    | 31                                                                                         | 14                                                                                                        | 0                                                                                                         | 5                                                                                                           | 19                                                       | 59.38                                               |
| 25-34                                                                            | 177                   | 160                                                                                        | 41                                                                                                        | 1                                                                                                         | 40                                                                                                          | 82                                                       | 46.33                                               |
| 35-49                                                                            | 191                   | 129                                                                                        | 31                                                                                                        | 0                                                                                                         | 33                                                                                                          | 64                                                       | 33.51                                               |
| <b>Round 14, January 18, 2010 - June 21, 2011; 28 communities surveyed</b>       |                       |                                                                                            |                                                                                                           |                                                                                                           |                                                                                                             |                                                          |                                                     |
| Total                                                                            | 1313                  | 964                                                                                        | 305                                                                                                       | 3                                                                                                         | 294                                                                                                         | 602                                                      | 45.85                                               |
| Female                                                                           | 869                   | 615                                                                                        | 166                                                                                                       | 2                                                                                                         | 173                                                                                                         | 341                                                      | 39.24                                               |
| Age                                                                              |                       |                                                                                            |                                                                                                           |                                                                                                           |                                                                                                             |                                                          |                                                     |
| 15-24                                                                            | 134                   | 125                                                                                        | 40                                                                                                        | 0                                                                                                         | 31                                                                                                          | 71                                                       | 52.99                                               |
| 25-34                                                                            | 379                   | 290                                                                                        | 81                                                                                                        | 1                                                                                                         | 85                                                                                                          | 167                                                      | 44.06                                               |
| 35-49                                                                            | 356                   | 200                                                                                        | 45                                                                                                        | 1                                                                                                         | 57                                                                                                          | 103                                                      | 28.93                                               |
| Male                                                                             | 444                   | 349                                                                                        | 139                                                                                                       | 1                                                                                                         | 121                                                                                                         | 261                                                      | 58.78                                               |
| Age                                                                              |                       |                                                                                            |                                                                                                           |                                                                                                           |                                                                                                             |                                                          |                                                     |
| 15-24                                                                            | 40                    | 38                                                                                         | 20                                                                                                        | 0                                                                                                         | 11                                                                                                          | 31                                                       | 77.5                                                |
| 25-34                                                                            | 185                   | 163                                                                                        | 58                                                                                                        | 1                                                                                                         | 61                                                                                                          | 120                                                      | 64.86                                               |
| 35-49                                                                            | 219                   | 148                                                                                        | 61                                                                                                        | 0                                                                                                         | 49                                                                                                          | 110                                                      | 50.23                                               |

<sup>†</sup> RNA samples were sequenced using the protocol of<sup>1</sup> at the Wellcome Trust Sanger Institute, Hinxton, UK on Illumina MiSeq platforms. Deep-sequences reported satisfied minimum quality criteria for deep-sequence phylogenetic analysis, see Methods. <sup>‡</sup> As for previous column, on Illumina HiSeq platforms. <sup>§</sup> RNA samples were sequenced using the protocol of<sup>2</sup> at the Oxford Genomics Centre, Oxford, UK on Illumina NovaSeq 6000 platforms. Deep-sequences reported satisfied minimum quality criteria for deep-sequence phylogenetic analysis, see Methods.

### Supplementary Table S5: Longitudinal HIV deep-sequencing.

|                                                                                  | Participants with HIV<br>(n) | Participants with HIV >1,000 cps/mL or reporting no ART use if viral load was not measured<br>(n) | Participants with HIV and with virus ever deep-sequenced with Illumina MiSeq in PANGEA-HIV 1 <sup>†</sup><br>(n) | Participants with HIV and with virus ever deep-sequenced with Illumina HiSeq in PANGEA-HIV 1 <sup>‡</sup><br>(n) | Participants with HIV and with virus ever deep-sequenced with Illumina NovaSeq in PANGEA-HIV 2 <sup>§</sup><br>(n) | Participants with HIV and with virus ever deep-sequenced<br>(n) | Sequence sampling coverage of participants with HIV<br>(%) |
|----------------------------------------------------------------------------------|------------------------------|---------------------------------------------------------------------------------------------------|------------------------------------------------------------------------------------------------------------------|------------------------------------------------------------------------------------------------------------------|--------------------------------------------------------------------------------------------------------------------|-----------------------------------------------------------------|------------------------------------------------------------|
| <b>Round 15, August 10, 2012 - July 05, 2013; 33 communities surveyed</b>        |                              |                                                                                                   |                                                                                                                  |                                                                                                                  |                                                                                                                    |                                                                 |                                                            |
| Total                                                                            | 1901                         | 1298                                                                                              | 282                                                                                                              | 2                                                                                                                | 802                                                                                                                | 1086                                                            | 57.13                                                      |
| Female                                                                           | 1264                         | 827                                                                                               | 152                                                                                                              | 1                                                                                                                | 484                                                                                                                | 637                                                             | 50.4                                                       |
| Age                                                                              |                              |                                                                                                   |                                                                                                                  |                                                                                                                  |                                                                                                                    |                                                                 |                                                            |
| 15-24                                                                            | 209                          | 178                                                                                               | 23                                                                                                               | 0                                                                                                                | 134                                                                                                                | 157                                                             | 75.12                                                      |
| 25-34                                                                            | 557                          | 398                                                                                               | 85                                                                                                               | 1                                                                                                                | 221                                                                                                                | 307                                                             | 55.12                                                      |
| 35-49                                                                            | 498                          | 251                                                                                               | 44                                                                                                               | 0                                                                                                                | 129                                                                                                                | 173                                                             | 34.74                                                      |
| Male                                                                             | 637                          | 471                                                                                               | 130                                                                                                              | 1                                                                                                                | 318                                                                                                                | 449                                                             | 70.49                                                      |
| Age                                                                              |                              |                                                                                                   |                                                                                                                  |                                                                                                                  |                                                                                                                    |                                                                 |                                                            |
| 15-24                                                                            | 67                           | 57                                                                                                | 17                                                                                                               | 0                                                                                                                | 37                                                                                                                 | 54                                                              | 80.6                                                       |
| 25-34                                                                            | 249                          | 208                                                                                               | 55                                                                                                               | 0                                                                                                                | 153                                                                                                                | 208                                                             | 83.53                                                      |
| 35-49                                                                            | 321                          | 206                                                                                               | 58                                                                                                               | 1                                                                                                                | 128                                                                                                                | 187                                                             | 58.26                                                      |
| <b>Round 16, July 08, 2013 - January 30, 2015; 35 communities surveyed</b>       |                              |                                                                                                   |                                                                                                                  |                                                                                                                  |                                                                                                                    |                                                                 |                                                            |
| Total                                                                            | 1874                         | 869                                                                                               | 383                                                                                                              | 3                                                                                                                | 506                                                                                                                | 892                                                             | 47.6                                                       |
| Female                                                                           | 1254                         | 536                                                                                               | 212                                                                                                              | 1                                                                                                                | 307                                                                                                                | 520                                                             | 41.47                                                      |
| Age                                                                              |                              |                                                                                                   |                                                                                                                  |                                                                                                                  |                                                                                                                    |                                                                 |                                                            |
| 15-24                                                                            | 194                          | 129                                                                                               | 36                                                                                                               | 0                                                                                                                | 47                                                                                                                 | 83                                                              | 42.78                                                      |
| 25-34                                                                            | 502                          | 238                                                                                               | 108                                                                                                              | 1                                                                                                                | 140                                                                                                                | 249                                                             | 49.6                                                       |
| 35-49                                                                            | 558                          | 169                                                                                               | 68                                                                                                               | 0                                                                                                                | 120                                                                                                                | 188                                                             | 33.69                                                      |
| Male                                                                             | 620                          | 333                                                                                               | 171                                                                                                              | 2                                                                                                                | 199                                                                                                                | 372                                                             | 60                                                         |
| Age                                                                              |                              |                                                                                                   |                                                                                                                  |                                                                                                                  |                                                                                                                    |                                                                 |                                                            |
| 15-24                                                                            | 50                           | 40                                                                                                | 21                                                                                                               | 0                                                                                                                | 14                                                                                                                 | 35                                                              | 70                                                         |
| 25-34                                                                            | 219                          | 141                                                                                               | 75                                                                                                               | 0                                                                                                                | 80                                                                                                                 | 155                                                             | 70.78                                                      |
| 35-49                                                                            | 351                          | 152                                                                                               | 75                                                                                                               | 2                                                                                                                | 105                                                                                                                | 182                                                             | 51.85                                                      |
| <b>Round 17, February 23, 2015 - September 02, 2016; 35 communities surveyed</b> |                              |                                                                                                   |                                                                                                                  |                                                                                                                  |                                                                                                                    |                                                                 |                                                            |
| Total                                                                            | 2015                         | 639                                                                                               | 604                                                                                                              | 4                                                                                                                | 326                                                                                                                | 934                                                             | 46.35                                                      |
| Female                                                                           | 1390                         | 402                                                                                               | 348                                                                                                              | 2                                                                                                                | 204                                                                                                                | 554                                                             | 39.86                                                      |
| Age                                                                              |                              |                                                                                                   |                                                                                                                  |                                                                                                                  |                                                                                                                    |                                                                 |                                                            |
| 15-24                                                                            | 205                          | 91                                                                                                | 82                                                                                                               | 0                                                                                                                | 15                                                                                                                 | 97                                                              | 47.32                                                      |
| 25-34                                                                            | 529                          | 190                                                                                               | 163                                                                                                              | 2                                                                                                                | 85                                                                                                                 | 250                                                             | 47.26                                                      |
| 35-49                                                                            | 656                          | 121                                                                                               | 103                                                                                                              | 0                                                                                                                | 104                                                                                                                | 207                                                             | 31.55                                                      |
| Male                                                                             | 625                          | 237                                                                                               | 256                                                                                                              | 2                                                                                                                | 122                                                                                                                | 380                                                             | 60.8                                                       |
| Age                                                                              |                              |                                                                                                   |                                                                                                                  |                                                                                                                  |                                                                                                                    |                                                                 |                                                            |
| 15-24                                                                            | 41                           | 28                                                                                                | 28                                                                                                               | 0                                                                                                                | 3                                                                                                                  | 31                                                              | 75.61                                                      |
| 25-34                                                                            | 208                          | 102                                                                                               | 101                                                                                                              | 0                                                                                                                | 38                                                                                                                 | 139                                                             | 66.83                                                      |
| 35-49                                                                            | 376                          | 107                                                                                               | 127                                                                                                              | 2                                                                                                                | 81                                                                                                                 | 210                                                             | 55.85                                                      |
| <b>Round 18, October 03, 2016 - May 22, 2018; 35 communities surveyed</b>        |                              |                                                                                                   |                                                                                                                  |                                                                                                                  |                                                                                                                    |                                                                 |                                                            |
| Total                                                                            | 1860                         | 416                                                                                               | 565                                                                                                              | 2                                                                                                                | 282                                                                                                                | 849                                                             | 45.65                                                      |
| Female                                                                           | 1275                         | 255                                                                                               | 315                                                                                                              | 1                                                                                                                | 176                                                                                                                | 492                                                             | 38.59                                                      |
| Age                                                                              |                              |                                                                                                   |                                                                                                                  |                                                                                                                  |                                                                                                                    |                                                                 |                                                            |
| 15-24                                                                            | 158                          | 71                                                                                                | 72                                                                                                               | 0                                                                                                                | 8                                                                                                                  | 80                                                              | 50.63                                                      |
| 25-34                                                                            | 461                          | 111                                                                                               | 135                                                                                                              | 1                                                                                                                | 72                                                                                                                 | 208                                                             | 45.12                                                      |
| 35-49                                                                            | 656                          | 73                                                                                                | 108                                                                                                              | 0                                                                                                                | 96                                                                                                                 | 204                                                             | 31.1                                                       |
| Male                                                                             | 585                          | 161                                                                                               | 250                                                                                                              | 1                                                                                                                | 106                                                                                                                | 357                                                             | 61.03                                                      |
| Age                                                                              |                              |                                                                                                   |                                                                                                                  |                                                                                                                  |                                                                                                                    |                                                                 |                                                            |
| 15-24                                                                            | 38                           | 22                                                                                                | 26                                                                                                               | 0                                                                                                                | 1                                                                                                                  | 27                                                              | 71.05                                                      |
| 25-34                                                                            | 183                          | 76                                                                                                | 101                                                                                                              | 0                                                                                                                | 27                                                                                                                 | 128                                                             | 69.95                                                      |
| 35-49                                                                            | 364                          | 63                                                                                                | 123                                                                                                              | 1                                                                                                                | 78                                                                                                                 | 202                                                             | 55.49                                                      |

<sup>†</sup> RNA samples were sequenced using the protocol of<sup>1</sup> at the Wellcome Trust Sanger Institute, Hinxton, UK on Illumina MiSeq platforms. Deep-sequences reported satisfied minimum quality criteria for deep-sequence phylogenetic analysis, see Methods. <sup>‡</sup> As for previous column, on Illumina HiSeq platforms. <sup>§</sup> RNA samples were sequenced using the protocol of<sup>2</sup> at the Oxford Genomics Centre, Oxford, UK on Illumina NovaSeq 6000 platforms. Deep-sequences reported satisfied minimum quality criteria for deep-sequence phylogenetic analysis, see Methods.

### Supplementary Table S5: Longitudinal HIV deep-sequencing (continued).

| Observed transmission events within 95% prediction interval (%)                                                                                                                                                                                               | Observed transmission events vs. predicted transmission events (MAE) <sup>†</sup> | Incidence rate prior mean within 95% posterior range (%) | Incidence rate prior mean vs. incidence rate posterior median (MAE) <sup>†</sup> |
|---------------------------------------------------------------------------------------------------------------------------------------------------------------------------------------------------------------------------------------------------------------|-----------------------------------------------------------------------------------|----------------------------------------------------------|----------------------------------------------------------------------------------|
| <b>Central model</b>                                                                                                                                                                                                                                          |                                                                                   |                                                          |                                                                                  |
| $\log \hat{\beta}_{r,i,j}^{g \rightarrow h} = \hat{e}^{g \rightarrow h}(i, j) + \gamma_0 + \gamma_g + \gamma_r + \gamma_{p(r)} + \mathbf{f}_0^{g \rightarrow h}(i, j) + \mathbf{f}_r^{g \rightarrow h}(j) + \mathbf{f}_{p(r)}^{g \rightarrow h}(i), (7c)$     |                                                                                   |                                                          |                                                                                  |
| 99.63                                                                                                                                                                                                                                                         | 0.0459                                                                            | 97.14                                                    | 0.00032                                                                          |
| <b>Alternative models</b>                                                                                                                                                                                                                                     |                                                                                   |                                                          |                                                                                  |
| $\log \hat{\beta}_{r,i,j}^{g \rightarrow h} = \hat{e}^{g \rightarrow h}(i, j) + \gamma_0 + \gamma_g + \gamma_r + \gamma_{p(r)} + \mathbf{f}_0^{g \rightarrow h}(i, j) + \mathbf{f}_{p(r)}^{g \rightarrow h}(i), (12a)$                                        |                                                                                   |                                                          |                                                                                  |
| 99.59                                                                                                                                                                                                                                                         | 0.0473                                                                            | 67.78                                                    | 0.00057                                                                          |
| $\log \hat{\beta}_{r,i,j}^{g \rightarrow h} = \hat{e}^{g \rightarrow h}(i, j) + \gamma_0 + \gamma_g + \gamma_r + \gamma_{p(r)} + \mathbf{f}_0^{g \rightarrow h}(i, j) + \mathbf{f}_{p(r)}^{g \rightarrow h}(j), (12b)$                                        |                                                                                   |                                                          |                                                                                  |
| 99.61                                                                                                                                                                                                                                                         | 0.0467                                                                            | 67.62                                                    | 0.00058                                                                          |
| $\log \hat{\beta}_{r,i,j}^{g \rightarrow h} = \hat{e}^{g \rightarrow h}(i, j) + \gamma_0 + \gamma_g + \gamma_r + \gamma_{p(r)} + \mathbf{f}_0^{g \rightarrow h}(i, j) + \mathbf{f}_{p(r)}^{g \rightarrow h}(i, j), (12c)$                                     |                                                                                   |                                                          |                                                                                  |
| 99.57                                                                                                                                                                                                                                                         | 0.0471                                                                            | 68.89                                                    | 0.00056                                                                          |
| $\log \hat{\beta}_{r,i,j}^{g \rightarrow h} = \hat{e}^{g \rightarrow h}(i, j) + \gamma_0 + \gamma_g + \gamma_r + \gamma_{p(r)} + \mathbf{f}_0^{g \rightarrow h}(i, j) + \mathbf{f}_r^{g \rightarrow h}(j), (12d)$                                             |                                                                                   |                                                          |                                                                                  |
| 99.57                                                                                                                                                                                                                                                         | 0.0457                                                                            | 96.35                                                    | 0.00033                                                                          |
| $\log \hat{\beta}_{r,i,j}^{g \rightarrow h} = \hat{e}^{g \rightarrow h}(i, j) + \gamma_0 + \gamma_g + \gamma_r + \gamma_{p(r)} + \mathbf{f}_0^{g \rightarrow h}(i, j) + \mathbf{f}_r^{g \rightarrow h}(j) + \mathbf{f}_{p(r)}^{g \rightarrow h}(j), (12e)$    |                                                                                   |                                                          |                                                                                  |
| 99.53                                                                                                                                                                                                                                                         | 0.0459                                                                            | 97.94                                                    | 0.00031                                                                          |
| $\log \hat{\beta}_{r,i,j}^{g \rightarrow h} = \hat{e}^{g \rightarrow h}(i, j) + \gamma_0 + \gamma_g + \gamma_r + \gamma_{p(r)} + \mathbf{f}_0^{g \rightarrow h}(i, j) + \mathbf{f}_r^{g \rightarrow h}(j) + \mathbf{f}_{p(r)}^{g \rightarrow h}(i, j), (12f)$ |                                                                                   |                                                          |                                                                                  |
| 99.61                                                                                                                                                                                                                                                         | 0.0459                                                                            | 97.14                                                    | 0.00031                                                                          |

<sup>†</sup> MAE: Mean absolute error.

### Supplementary Table S6: Model comparison for estimating longitudinal, age-specific transmission flows.

## S20 LIST OF TABLES

| Transmission direction                                                           | Male-female difference in age at transmission | Infected partner by age at transmission |                              |                              | Total (%) <sup>†</sup> |
|----------------------------------------------------------------------------------|-----------------------------------------------|-----------------------------------------|------------------------------|------------------------------|------------------------|
|                                                                                  |                                               | 15-24 years (%) <sup>†</sup>            | 25-34 years (%) <sup>†</sup> | 35-49 years (%) <sup>†</sup> |                        |
| <b>Round 10, September 26, 2003 - November 23, 2004; 28 communities surveyed</b> |                                               |                                         |                              |                              |                        |
| Male to female                                                                   | Total                                         | 31.9% [30.2-33.5]                       | 18.8% [17.9-19.7]            | 7.3% [6.7-7.9]               | 57.9% [56.2-59.6]      |
|                                                                                  | <0 years                                      | 0.4% [0.2-0.6]                          | 5.6% [3.9-7.4]               | 4.0% [2.6-5.5]               | 10.0% [7.5-12.5]       |
|                                                                                  | 0-6 years                                     | 15.5% [12.3-18.9]                       | 7.7% [6.2-9.3]               | 3.0% [1.8-4.4]               | 26.3% [22.4-30.4]      |
|                                                                                  | >6 years                                      | 16.0% [12.7-19.2]                       | 5.4% [3.9-7.3]               | 0.2% [0.0-0.5]               | 21.6% [17.6-25.7]      |
| Female to male                                                                   | Total                                         | 14.8% [13.9-15.8]                       | 20.6% [19.7-21.6]            | 6.6% [6.2-7.1]               | 42.1% [40.4-43.8]      |
|                                                                                  | <0 years                                      | 6.6% [4.9-8.3]                          | 4.7% [3.2-6.5]               | 0.4% [0.2-0.8]               | 11.7% [8.8-14.9]       |
|                                                                                  | 0-6 years                                     | 8.2% [6.2-10.1]                         | 11.8% [9.9-13.4]             | 2.6% [1.8-3.4]               | 22.5% [19.4-25.6]      |
|                                                                                  | >6 years                                      | 0.1% [0.0-0.2]                          | 4.1% [2.7-5.9]               | 3.6% [2.6-4.7]               | 7.8% [5.7-10.1]        |
| Total                                                                            |                                               | 46.7% [45.3-48.1]                       | 39.4% [38.3-40.6]            | 13.9% [13.2-14.6]            | 100%                   |
| <b>Round 15, August 10, 2011 - July 05, 2013; 33 communities surveyed</b>        |                                               |                                         |                              |                              |                        |
| Male to female                                                                   | Total                                         | 32.2% [30.2-34.3]                       | 22.0% [20.7-23.4]            | 7.7% [7.0-8.5]               | 61.9% [60.2-63.7]      |
|                                                                                  | <0 years                                      | 0.5% [0.2-0.8]                          | 6.0% [4.1-8.1]               | 3.8% [2.3-5.4]               | 10.3% [7.6-13.1]       |
|                                                                                  | 0-6 years                                     | 15.4% [12.2-19.0]                       | 9.0% [7.1-11.0]              | 3.6% [2.2-5.0]               | 28.0% [23.8-32.4]      |
|                                                                                  | >6 years                                      | 16.2% [12.8-19.7]                       | 7.0% [5.1-9.1]               | 0.3% [0.1-0.8]               | 23.6% [19.2-28.0]      |
| Female to male                                                                   | Total                                         | 11.5% [10.6-12.4]                       | 18.8% [17.8-19.9]            | 7.8% [7.2-8.4]               | 38.1% [36.3-39.8]      |
|                                                                                  | <0 years                                      | 6.2% [4.8-7.7]                          | 4.6% [3.2-6.4]               | 0.6% [0.2-1.1]               | 11.4% [8.8-14.3]       |
|                                                                                  | 0-6 years                                     | 5.2% [3.9-6.6]                          | 11.3% [9.6-12.8]             | 3.2% [2.2-4.3]               | 19.7% [16.9-22.4]      |
|                                                                                  | >6 years                                      | 0.0% [0.0-0.0]                          | 2.9% [1.9-4.1]               | 3.9% [2.8-5.2]               | 6.9% [5.1-8.8]         |
| Total                                                                            |                                               | 43.6% [41.8-45.5]                       | 40.9% [39.3-42.4]            | 15.5% [14.5-16.4]            | 100%                   |
| <b>Round 18, October 03, 2016 - May 22, 2018; 35 communities surveyed</b>        |                                               |                                         |                              |                              |                        |
| Male to female                                                                   | Total                                         | 20.6% [18.1-23.4]                       | 27.3% [25.2-29.5]            | 14.7% [13.3-16.3]            | 62.8% [60.2-65.2]      |
|                                                                                  | <0 years                                      | 0.3% [0.1-0.6]                          | 6.7% [3.9-10.1]              | 7.0% [4.5-9.7]               | 14.0% [9.8-18.8]       |
|                                                                                  | 0-6 years                                     | 8.1% [5.6-11.0]                         | 12.0% [9.1-15.0]             | 7.1% [4.7-9.7]               | 27.3% [23.1-31.8]      |
|                                                                                  | >6 years                                      | 12.1% [9.3-15.2]                        | 8.5% [5.8-11.9]              | 0.5% [0.1-1.5]               | 21.3% [16.8-26.3]      |
| Female to male                                                                   | Total                                         | 11.2% [9.9-12.6]                        | 17.4% [15.9-19.1]            | 8.6% [7.6-9.7]               | 37.2% [34.8-39.8]      |
|                                                                                  | <0 years                                      | 5.5% [3.9-7.3]                          | 3.8% [2.5-5.5]               | 0.5% [0.2-1.1]               | 9.8% [7.2-13.0]        |
|                                                                                  | 0-6 years                                     | 5.7% [3.9-7.4]                          | 10.6% [8.9-12.3]             | 3.2% [2.0-4.5]               | 19.5% [16.6-22.4]      |
|                                                                                  | >6 years                                      | 0.0% [0.0-0.1]                          | 2.9% [1.9-4.3]               | 4.9% [3.5-6.5]               | 7.9% [5.9-10.1]        |
| Total                                                                            |                                               | 31.8% [29.4-34.5]                       | 44.8% [42.5-47.0]            | 23.4% [21.6-25.2]            | 100%                   |

<sup>†</sup> Posterior median flow estimates and 95% credible intervals in each survey round.

### Supplementary Table S7: Longitudinal HIV transmission flows by age and gender.

|        | Participants<br>(n) | Contacts with reported partner characteristics<br>(%) | Reported contacts per participant<br>(n) | Estimated contacts per person<br>(median, 95% CrI) | Estimated reporting bias<br>(median, 95% CrI) | Reported contacts scaled to population<br>(n) | Estimated contacts scaled to population<br>(median, 95% CrI) |
|--------|---------------------|-------------------------------------------------------|------------------------------------------|----------------------------------------------------|-----------------------------------------------|-----------------------------------------------|--------------------------------------------------------------|
| Total  | 13,277              | 85.1                                                  | 0.74                                     | 0.84<br>[0.76, 0.95]                               | 0.1<br>[0.02, 0.21]                           | 16,025                                        | 18,183<br>[16,450, 20,613]                                   |
| Female | 7,375               | 87.69                                                 | 0.64                                     | 0.81<br>[0.74, 0.91]                               | 0.17<br>[0.10, 0.27]                          | 7,189                                         | 9,092<br>[8,284, 10,238]                                     |
| Age    |                     |                                                       |                                          |                                                    |                                               |                                               |                                                              |
| 15-19  | 1,296               | 84.20                                                 | 0.34                                     | 0.48<br>[0.44, 0.54]                               | 0.14<br>[0.09, 0.20]                          | 844                                           | 1,187<br>[1,067, 1,321]                                      |
| 20-24  | 1,378               | 91.06                                                 | 0.84                                     | 1.17<br>[1.09, 1.25]                               | 0.33<br>[0.25, 0.41]                          | 1,787                                         | 2,487<br>[2,324, 2,662]                                      |
| 25-29  | 1,432               | 85.99                                                 | 0.90                                     | 1.18<br>[1.10, 1.26]                               | 0.27<br>[0.20, 0.36]                          | 1,704                                         | 2,221<br>[2,074, 2,381]                                      |
| 30-34  | 1,323               | 87.64                                                 | 0.84                                     | 0.99<br>[0.92, 1.08]                               | 0.15<br>[0.07, 0.24]                          | 1,334                                         | 1,569<br>[1,451, 1,705]                                      |
| 35-39  | 1,007               | 87.60                                                 | 0.75                                     | 0.83<br>[0.75, 0.95]                               | 0.08<br>[0.00, 0.20]                          | 849                                           | 942<br>[847, 1,075]                                          |
| 40-44  | 562                 | 90.03                                                 | 0.60                                     | 0.65<br>[0.55, 0.81]                               | 0.05<br>[-0.05, 0.21]                         | 436                                           | 472<br>[398, 588]                                            |
| 45-49  | 377                 | 83.73                                                 | 0.49                                     | 0.34<br>[0.21, 0.61]                               | -0.15<br>[-0.28, 0.12]                        | 236                                           | 164<br>[102, 293]                                            |
| 50-54  | 0                   | -                                                     | -                                        | 0.13<br>[0.06, 0.36]                               | -                                             | -                                             | 43<br>[20, 124]                                              |
| 55-59  | 0                   | -                                                     | -                                        | 0.01<br>[0.00, 0.18]                               | -                                             | -                                             | 4<br>[1, 45]                                                 |
| 60-64  | 0                   | -                                                     | -                                        | 0.01<br>[0.00, 0.14]                               | -                                             | -                                             | 1<br>[0, 24]                                                 |
| 65-69  | 0                   | -                                                     | -                                        | 0.01<br>[0.00, 0.17]                               | -                                             | -                                             | 1<br>[0, 20]                                                 |
| Male   | 5,902               | 82.58                                                 | 0.85                                     | 0.88<br>[0.79, 1.00]                               | 0.02<br>[-0.06, 0.15]                         | 8,836                                         | 9,091<br>[8,166, 10,374]                                     |
| Age    |                     |                                                       |                                          |                                                    |                                               |                                               |                                                              |
| 15-19  | 1,295               | 66.42                                                 | 0.20                                     | 0.17<br>[0.14, 0.20]                               | -0.04<br>[-0.06, -0.01]                       | 444                                           | 363<br>[306, 431]                                            |
| 20-24  | 1,001               | 75.50                                                 | 0.84                                     | 0.79<br>[0.72, 0.87]                               | -0.04<br>[-0.11, 0.03]                        | 1,528                                         | 1,447<br>[1,321, 1,585]                                      |
| 25-29  | 1,001               | 82.29                                                 | 1.17                                     | 1.15<br>[1.07, 1.24]                               | -0.02<br>[-0.10, 0.07]                        | 1,928                                         | 1,902<br>[1,763, 2,049]                                      |
| 30-34  | 913                 | 84.05                                                 | 1.26                                     | 1.28<br>[1.19, 1.37]                               | 0.02<br>[-0.08, 0.11]                         | 1,858                                         | 1,881<br>[1,747, 2,022]                                      |
| 35-39  | 796                 | 83.82                                                 | 1.36                                     | 1.31<br>[1.21, 1.41]                               | -0.05<br>[-0.14, 0.05]                        | 1,587                                         | 1,530<br>[1,418, 1,648]                                      |
| 40-44  | 554                 | 88.94                                                 | 1.20                                     | 1.22<br>[1.11, 1.33]                               | 0.01<br>[-0.09, 0.12]                         | 990                                           | 999<br>[913, 1,089]                                          |
| 45-49  | 342                 | 91.35                                                 | 0.97                                     | 1.12<br>[0.98, 1.27]                               | 0.15<br>[0.01, 0.30]                          | 502                                           | 580<br>[509, 656]                                            |
| 50-54  | 0                   | -                                                     | -                                        | 0.79<br>[0.47, 1.31]                               | -                                             | -                                             | 251<br>[151, 417]                                            |
| 55-59  | 0                   | -                                                     | -                                        | 0.48<br>[0.15, 1.43]                               | -                                             | -                                             | 98<br>[30, 290]                                              |
| 60-64  | 0                   | -                                                     | -                                        | 0.26<br>[0.06, 1.14]                               | -                                             | -                                             | 33<br>[7, 142]                                               |
| 65-69  | 0                   | -                                                     | -                                        | 0.10<br>[0.02, 0.62]                               | -                                             | -                                             | 7<br>[1, 45]                                                 |

**Supplementary Table S8: Sexual behaviour characteristics in RCCS participants, round 15, October 08 2011 - July 05 2013.**



## S22 LIST OF TABLES

|                                                                                  | Participants reporting no ART use and who have suppressed virus | Participants reporting no ART use and who have unsuppressed virus | Participants reporting ART use and who have suppressed virus | Participants reporting ART use and who have unsuppressed virus | Sensitivity         | Specificity        |
|----------------------------------------------------------------------------------|-----------------------------------------------------------------|-------------------------------------------------------------------|--------------------------------------------------------------|----------------------------------------------------------------|---------------------|--------------------|
| <b>Round 15, August 10, 2011 - July 05, 2013; 33 communities surveyed</b>        |                                                                 |                                                                   |                                                              |                                                                |                     |                    |
| Total                                                                            | 65                                                              | 202                                                               | 95                                                           | 5                                                              | 95.0% [88.5- 98.1]  | 75.7% [70.2- 80.4] |
| Female                                                                           | 44                                                              | 118                                                               | 66                                                           | 4                                                              | 94.3% [85.8- 98.2]  | 72.8% [65.5- 79.1] |
| Age                                                                              |                                                                 |                                                                   |                                                              |                                                                |                     |                    |
| 15-24                                                                            | 5                                                               | 22                                                                | 3                                                            | 1                                                              | 75.0% [28.9- 96.6]  | 81.5% [62.8- 92.3] |
| 25-34                                                                            | 19                                                              | 63                                                                | 18                                                           | 1                                                              | 94.7% [73.5-100.0]  | 76.8% [66.5- 84.7] |
| 35-49                                                                            | 20                                                              | 33                                                                | 45                                                           | 2                                                              | 95.7% [85.0- 99.6]  | 62.3% [48.8- 74.1] |
| Male                                                                             | 21                                                              | 84                                                                | 29                                                           | 1                                                              | 96.7% [81.9-100.0]  | 80.0% [71.3- 86.6] |
| Age                                                                              |                                                                 |                                                                   |                                                              |                                                                |                     |                    |
| 15-24                                                                            | 1                                                               | 10                                                                | 0                                                            | 0                                                              |                     | 90.9% [60.1-100.0] |
| 25-34                                                                            | 8                                                               | 41                                                                | 8                                                            | 0                                                              | 100.0% [62.8-100.0] | 83.7% [70.7- 91.8] |
| 35-49                                                                            | 12                                                              | 33                                                                | 21                                                           | 1                                                              | 95.5% [76.5-100.0]  | 73.3% [58.8- 84.2] |
| <b>Round 16, July 08, 2013 - January 30, 2015; 35 communities surveyed</b>       |                                                                 |                                                                   |                                                              |                                                                |                     |                    |
| Total                                                                            | 235                                                             | 596                                                               | 923                                                          | 75                                                             | 92.5% [90.7- 94.0]  | 71.7% [68.6- 74.7] |
| Female                                                                           | 171                                                             | 342                                                               | 663                                                          | 48                                                             | 93.2% [91.1- 94.9]  | 66.7% [62.5- 70.6] |
| Age                                                                              |                                                                 |                                                                   |                                                              |                                                                |                     |                    |
| 15-24                                                                            | 37                                                              | 87                                                                | 55                                                           | 10                                                             | 84.6% [73.7- 91.6]  | 70.2% [61.6- 77.5] |
| 25-34                                                                            | 72                                                              | 152                                                               | 239                                                          | 23                                                             | 91.2% [87.1- 94.1]  | 67.9% [61.5- 73.6] |
| 35-49                                                                            | 62                                                              | 103                                                               | 369                                                          | 15                                                             | 96.1% [93.6- 97.7]  | 62.4% [54.8- 69.5] |
| Male                                                                             | 64                                                              | 254                                                               | 260                                                          | 27                                                             | 90.6% [86.6- 93.5]  | 79.9% [75.1- 83.9] |
| Age                                                                              |                                                                 |                                                                   |                                                              |                                                                |                     |                    |
| 15-24                                                                            | 5                                                               | 32                                                                | 8                                                            | 2                                                              | 80.0% [47.9- 95.4]  | 86.5% [71.5- 94.6] |
| 25-34                                                                            | 19                                                              | 115                                                               | 70                                                           | 8                                                              | 89.7% [80.8- 94.9]  | 85.8% [78.8- 90.8] |
| 35-49                                                                            | 40                                                              | 107                                                               | 182                                                          | 17                                                             | 91.5% [86.7- 94.7]  | 72.8% [65.1- 79.4] |
| <b>Round 17, February 23, 2015 - September 02, 2016; 35 communities surveyed</b> |                                                                 |                                                                   |                                                              |                                                                |                     |                    |
| Total                                                                            | 221                                                             | 421                                                               | 1269                                                         | 93                                                             | 93.2% [91.7- 94.4]  | 65.6% [61.8- 69.2] |
| Female                                                                           | 165                                                             | 241                                                               | 915                                                          | 63                                                             | 93.6% [91.8- 94.9]  | 59.4% [54.5- 64.0] |
| Age                                                                              |                                                                 |                                                                   |                                                              |                                                                |                     |                    |
| 15-24                                                                            | 28                                                              | 66                                                                | 92                                                           | 18                                                             | 83.6% [75.5- 89.5]  | 70.2% [60.3- 78.5] |
| 25-34                                                                            | 73                                                              | 119                                                               | 305                                                          | 28                                                             | 91.6% [88.1- 94.2]  | 62.0% [54.9- 68.6] |
| 35-49                                                                            | 64                                                              | 56                                                                | 518                                                          | 17                                                             | 96.8% [94.9- 98.0]  | 46.7% [38.0- 55.6] |
| Male                                                                             | 56                                                              | 180                                                               | 354                                                          | 30                                                             | 92.2% [89.0- 94.5]  | 76.3% [70.4- 81.3] |
| Age                                                                              |                                                                 |                                                                   |                                                              |                                                                |                     |                    |
| 15-24                                                                            | 3                                                               | 24                                                                | 11                                                           | 2                                                              | 84.6% [56.5- 96.9]  | 88.9% [71.1- 97.0] |
| 25-34                                                                            | 19                                                              | 82                                                                | 96                                                           | 9                                                              | 91.4% [84.3- 95.6]  | 81.2% [72.4- 87.7] |
| 35-49                                                                            | 34                                                              | 74                                                                | 247                                                          | 19                                                             | 92.9% [89.1- 95.4]  | 68.5% [59.2- 76.5] |
| <b>Round 18, October 03, 2016 - May 22, 2018; 35 communities surveyed</b>        |                                                                 |                                                                   |                                                              |                                                                |                     |                    |
| Total                                                                            | 141                                                             | 288                                                               | 1334                                                         | 87                                                             | 93.9% [92.5- 95.0]  | 67.1% [62.6- 71.4] |
| Female                                                                           | 109                                                             | 153                                                               | 956                                                          | 53                                                             | 94.7% [93.2- 96.0]  | 58.4% [52.3- 64.2] |
| Age                                                                              |                                                                 |                                                                   |                                                              |                                                                |                     |                    |
| 15-24                                                                            | 20                                                              | 52                                                                | 75                                                           | 11                                                             | 87.2% [78.4- 92.9]  | 72.2% [60.9- 81.3] |
| 25-34                                                                            | 48                                                              | 68                                                                | 314                                                          | 27                                                             | 92.1% [88.7- 94.5]  | 58.6% [49.5- 67.2] |
| 35-49                                                                            | 41                                                              | 33                                                                | 567                                                          | 15                                                             | 97.4% [95.8- 98.5]  | 44.6% [33.8- 55.9] |
| Male                                                                             | 32                                                              | 135                                                               | 378                                                          | 34                                                             | 91.7% [88.7- 94.1]  | 80.8% [74.2- 86.1] |
| Age                                                                              |                                                                 |                                                                   |                                                              |                                                                |                     |                    |
| 15-24                                                                            | 1                                                               | 20                                                                | 11                                                           | 4                                                              | 73.3% [47.6- 89.5]  | 95.2% [75.6-100.0] |
| 25-34                                                                            | 15                                                              | 64                                                                | 90                                                           | 14                                                             | 86.5% [78.5- 91.9]  | 81.0% [70.9- 88.3] |
| 35-49                                                                            | 16                                                              | 51                                                                | 277                                                          | 16                                                             | 94.5% [91.3- 96.7]  | 76.1% [64.6- 84.8] |

**Supplementary Table S9: Self-reported ART use and viral suppression in RCCS participants with HIV.**

| Contribution from male sources to incidence                                                           |             |             | Median age of male sources |             |             | Median age of female sources |             |             | Counterfactual additional number of men suppressed |                             |                 | Counterfactual reduction in incidence in female |                             |                 |
|-------------------------------------------------------------------------------------------------------|-------------|-------------|----------------------------|-------------|-------------|------------------------------|-------------|-------------|----------------------------------------------------|-----------------------------|-----------------|-------------------------------------------------|-----------------------------|-----------------|
| Round 10                                                                                              | Round 14    | Round 18    | Round 10                   | Round 14    | Round 18    | Round 10                     | Round 14    | Round 18    | Closing half the suppression gap                   | Closing the suppression gap | 95-95-95 in men | Closing half the suppression gap                | Closing the suppression gap | 95-95-95 in men |
| <b>Central analysis</b>                                                                               |             |             |                            |             |             |                              |             |             |                                                    |                             |                 |                                                 |                             |                 |
| 57.9%                                                                                                 | 61.4%       | 62.8%       | 28.5                       | 30.1        | 33.5        | 25.0                         | 26.8        | 26.0        | 75.1                                               | 150.2                       | 172.6           | 25.1%                                           | 50.6%                       | 58.4%           |
| [56.2-59.6]                                                                                           | [59.8-63.1] | [60.2-65.2] | [22.8-40.2]                | [22.6-41.0] | [23.6-41.6] | [18.0-36.2]                  | [19.7-37.2] | [19.0-36.4] | [53.9-96.4]                                        | [107.8-192.8]               | [136.8-210.3]   | [24.2-26.2]                                     | [48.6-52.8]                 | [54.9-61.7]     |
| <b>Sensitivity analyses</b>                                                                           |             |             |                            |             |             |                              |             |             |                                                    |                             |                 |                                                 |                             |                 |
| <i>Using incidence rates estimated with LOESS regression</i>                                          |             |             |                            |             |             |                              |             |             |                                                    |                             |                 |                                                 |                             |                 |
| 61.5%                                                                                                 | 57.5%       | 62.1%       | 27.7                       | 31.8        | 34.0        | 24.0                         | 25.0        | 26.0        | 75.1                                               | 150.2                       | 172.6           | 25.3%                                           | 50.9%                       | 58.1%           |
| [59.5-63.5]                                                                                           | [55.5-59.5] | [60.4-63.9] | [22.3-38.8]                | [23.1-42.8] | [23.8-41.6] | [18.0-34.8]                  | [18.9-36.0] | [18.3-35.9] | [53.9-96.4]                                        | [107.8-192.8]               | [136.8-210.3]   | [24.1-26.6]                                     | [48.5-53.6]                 | [53.6-62.1]     |
| <i>Using incidence rates estimated on a data subset to 28 continuously surveyed communities</i>       |             |             |                            |             |             |                              |             |             |                                                    |                             |                 |                                                 |                             |                 |
| 58.2%                                                                                                 | 62.3%       | 64.3%       | 29.5                       | 31.0        | 34.0        | 25.0                         | 27.7        | 27.0        | 75.1                                               | 150.2                       | 172.6           | 25.5%                                           | 51.5%                       | 56.4%           |
| [56.5-59.8]                                                                                           | [60.6-64.0] | [61.6-66.9] | [23.0-41.1]                | [23.0-42.1] | [24.2-43.0] | [18.0-36.4]                  | [19.4-37.2] | [19.0-37.0] | [53.9-96.4]                                        | [107.8-192.8]               | [136.8-210.3]   | [24.3-26.9]                                     | [48.9-54.3]                 | [52.0-60.6]     |
| <i>Using non-refined infection time estimates</i>                                                     |             |             |                            |             |             |                              |             |             |                                                    |                             |                 |                                                 |                             |                 |
| 57.9%                                                                                                 | 61.4%       | 62.8%       | 28.1                       | 30.0        | 33.4        | 24.5                         | 26.0        | 25.8        | 75.1                                               | 150.2                       | 172.6           | 25.1%                                           | 50.6%                       | 58.3%           |
| [56.1-59.6]                                                                                           | [59.8-63.0] | [60.3-65.2] | [22.6-40.2]                | [22.3-41.3] | [23.7-42.0] | [18.0-36.3]                  | [19.6-37.4] | [19.0-36.5] | [53.9-96.4]                                        | [107.8-192.8]               | [136.8-210.3]   | [24.0-26.3]                                     | [48.3-53.0]                 | [54.6-62.0]     |
| <i>Without source-recipients pairs for which the source or recipient was sequenced after round 17</i> |             |             |                            |             |             |                              |             |             |                                                    |                             |                 |                                                 |                             |                 |
| 58.0%                                                                                                 | 61.4%       | 62.8%       | 28.0                       | 29.8        | 32.9        | 25.2                         | 27.0        | 26.0        | 75.1                                               | 150.2                       | 172.6           | 24.8%                                           | 50.0%                       | 59.4%           |
| [56.2-59.7]                                                                                           | [59.8-63.1] | [60.2-65.2] | [22.7-40.0]                | [22.4-40.9] | [23.0-41.5] | [18.1-36.7]                  | [20.0-37.6] | [19.7-36.7] | [53.9-96.4]                                        | [107.8-192.8]               | [136.8-210.3]   | [23.7-26.0]                                     | [47.7-52.4]                 | [55.6-63.1]     |
| <i>Without source-recipients pairs for which the source or recipient was sequenced after round 16</i> |             |             |                            |             |             |                              |             |             |                                                    |                             |                 |                                                 |                             |                 |
| 58.0%                                                                                                 | 61.4%       | 62.7%       | 28.0                       | 30.0        | 33.0        | 24.7                         | 26.0        | 25.0        | 75.1                                               | 150.2                       | 172.6           | 24.9%                                           | 50.1%                       | 59.0%           |
| [56.3-59.7]                                                                                           | [59.8-63.0] | [60.2-65.2] | [22.8-39.9]                | [22.6-40.8] | [23.9-41.1] | [18.0-36.5]                  | [19.8-37.6] | [19.0-36.2] | [53.9-96.4]                                        | [107.8-192.8]               | [136.8-210.3]   | [23.6-26.2]                                     | [47.5-52.8]                 | [55.0-63.1]     |
| <i>Without source-recipients pairs for which the source or recipient was sequenced after round 15</i> |             |             |                            |             |             |                              |             |             |                                                    |                             |                 |                                                 |                             |                 |
| 58.0%                                                                                                 | 61.4%       | 62.8%       | 28.1                       | 30.0        | 33.4        | 25.0                         | 26.9        | 25.6        | 75.1                                               | 150.2                       | 172.6           | 24.9%                                           | 50.2%                       | 58.7%           |
| [56.2-59.7]                                                                                           | [59.7-63.0] | [60.3-65.2] | [22.8-39.6]                | [22.5-40.7] | [24.0-41.2] | [18.0-37.0]                  | [19.6-38.0] | [19.0-36.8] | [53.9-96.4]                                        | [107.8-192.8]               | [136.8-210.3]   | [23.6-26.3]                                     | [47.5-52.9]                 | [54.5-63.0]     |
| <i>Using a bootstrap sample of the source-recipient pairs (first draw)</i>                            |             |             |                            |             |             |                              |             |             |                                                    |                             |                 |                                                 |                             |                 |
| 58.0%                                                                                                 | 61.4%       | 62.8%       | 29.2                       | 31.0        | 34.0        | 25.4                         | 27.1        | 29.0        | 75.1                                               | 150.2                       | 172.6           | 25.4%                                           | 51.2%                       | 57.0%           |
| [56.2-59.7]                                                                                           | [59.8-63.0] | [60.2-65.2] | [23.0-40.3]                | [23.0-41.1] | [24.1-42.0] | [18.8-36.1]                  | [19.8-37.0] | [20.0-36.0] | [53.9-96.4]                                        | [107.8-192.8]               | [136.8-210.3]   | [24.5-26.4]                                     | [49.2-53.2]                 | [53.9-60.2]     |
| <i>Using a bootstrap sample of the source-recipient pairs (second draw)</i>                           |             |             |                            |             |             |                              |             |             |                                                    |                             |                 |                                                 |                             |                 |
| 57.8%                                                                                                 | 61.4%       | 62.7%       | 29.5                       | 31.0        | 31.4        | 24.0                         | 26.0        | 25.0        | 75.1                                               | 150.2                       | 172.6           | 24.4%                                           | 49.1%                       | 60.8%           |
| [56.1-59.5]                                                                                           | [59.7-63.0] | [60.3-65.2] | [23.0-40.0]                | [23.0-40.6] | [23.0-41.1] | [18.0-36.8]                  | [19.4-37.8] | [19.0-35.3] | [53.9-96.4]                                        | [107.8-192.8]               | [136.8-210.3]   | [23.4-25.3]                                     | [47.1-51.0]                 | [57.5-64.1]     |
| <i>Using a bootstrap sample of the source-recipient pairs (third draw)</i>                            |             |             |                            |             |             |                              |             |             |                                                    |                             |                 |                                                 |                             |                 |
| 57.9%                                                                                                 | 61.4%       | 62.7%       | 29.0                       | 31.0        | 34.0        | 24.6                         | 26.4        | 25.0        | 75.1                                               | 150.2                       | 172.6           | 25.5%                                           | 51.4%                       | 57.3%           |
| [56.1-59.5]                                                                                           | [59.7-63.1] | [60.3-65.2] | [22.7-40.5]                | [22.4-41.3] | [23.0-42.0] | [18.0-36.9]                  | [19.4-37.9] | [19.0-36.7] | [53.9-96.4]                                        | [107.8-192.8]               | [136.8-210.3]   | [24.4-26.7]                                     | [49.2-53.8]                 | [53.4-61.0]     |

Supplementary Table S10: Sensitivity analyses.

| Contribution from male sources to incidence                                                                                                     |             |             | Median age of male sources |             |             | Median age of female sources |             |             | Counterfactual additional number of men suppressed |                             |                 | Counterfactual reduction in incidence in female |                             |                 |
|-------------------------------------------------------------------------------------------------------------------------------------------------|-------------|-------------|----------------------------|-------------|-------------|------------------------------|-------------|-------------|----------------------------------------------------|-----------------------------|-----------------|-------------------------------------------------|-----------------------------|-----------------|
| Round 10                                                                                                                                        | Round 14    | Round 18    | Round 10                   | Round 14    | Round 18    | Round 10                     | Round 14    | Round 18    | Closing half the suppression gap                   | Closing the suppression gap | 95-95-95 in men | Closing half the suppression gap                | Closing the suppression gap | 95-95-95 in men |
| <i>Assuming an alternative form of the transmission rate (12a)</i>                                                                              |             |             |                            |             |             |                              |             |             |                                                    |                             |                 |                                                 |                             |                 |
| 60.3%                                                                                                                                           | 60.7%       | 64.3%       | 29.0                       | 31.7        | 35.0        | 24.6                         | 26.4        | 26.0        | 75.1                                               | 150.2                       | 172.6           | 25.7%                                           | 52.0%                       | 55.3%           |
| [59.3-61.3]                                                                                                                                     | [59.8-61.6] | [63.0-65.9] | [23.0-44.9]                | [23.0-48.6] | [24.1-43.4] | [17.9-36.3]                  | [19.3-37.4] | [19.0-36.7] | [53.9-96.4]                                        | [107.8-192.8]               | [136.8-210.3]   | [24.8-26.6]                                     | [50.2-53.7]                 | [52.3-59.5]     |
| <i>Assuming an alternative form of the transmission rate (12b)</i>                                                                              |             |             |                            |             |             |                              |             |             |                                                    |                             |                 |                                                 |                             |                 |
| 60.5%                                                                                                                                           | 60.6%       | 63.8%       | 30.0                       | 32.0        | 33.0        | 24.5                         | 26.3        | 25.2        | 75.1                                               | 150.2                       | 172.6           | 24.9%                                           | 50.3%                       | 57.0%           |
| [59.5-61.4]                                                                                                                                     | [59.7-61.5] | [62.5-65.1] | [23.0-42.5]                | [23.0-46.4] | [23.0-46.5] | [17.8-36.4]                  | [19.3-37.5] | [18.8-36.7] | [53.9-96.4]                                        | [107.8-192.8]               | [136.8-210.3]   | [24.2-25.6]                                     | [48.8-51.8]                 | [54.0-60.5]     |
| <i>Assuming an alternative form of the transmission rate (12c)</i>                                                                              |             |             |                            |             |             |                              |             |             |                                                    |                             |                 |                                                 |                             |                 |
| 60.4%                                                                                                                                           | 60.6%       | 64.0%       | 29.7                       | 32.0        | 33.5        | 24.6                         | 26.3        | 26.0        | 75.1                                               | 150.2                       | 172.6           | 25.0%                                           | 50.6%                       | 56.9%           |
| [59.4-61.3]                                                                                                                                     | [59.7-61.5] | [62.7-65.4] | [23.0-43.8]                | [23.0-48.0] | [23.3-44.8] | [17.9-36.4]                  | [19.4-37.5] | [19.0-36.8] | [53.9-96.4]                                        | [107.8-192.8]               | [136.8-210.3]   | [24.1-26.1]                                     | [48.7-52.7]                 | [53.4-60.5]     |
| <i>Assuming an alternative form of the transmission rate (12d)</i>                                                                              |             |             |                            |             |             |                              |             |             |                                                    |                             |                 |                                                 |                             |                 |
| 57.9%                                                                                                                                           | 61.4%       | 62.7%       | 29.0                       | 30.5        | 32.9        | 25.0                         | 26.5        | 25.8        | 75.1                                               | 150.2                       | 172.6           | 24.9%                                           | 50.2%                       | 59.1%           |
| [56.2-59.6]                                                                                                                                     | [59.8-63.0] | [60.2-65.2] | [23.0-40.1]                | [22.9-40.9] | [23.0-42.0] | [18.0-36.1]                  | [19.7-37.1] | [19.0-36.5] | [53.9-96.4]                                        | [107.8-192.8]               | [136.8-210.3]   | [24.1-25.7]                                     | [48.8-51.9]                 | [56.2-61.9]     |
| <i>Assuming an alternative form of the transmission rate (12e)</i>                                                                              |             |             |                            |             |             |                              |             |             |                                                    |                             |                 |                                                 |                             |                 |
| 58.0%                                                                                                                                           | 61.4%       | 62.8%       | 29.0                       | 30.5        | 33.0        | 25.0                         | 26.7        | 25.9        | 75.1                                               | 150.2                       | 172.6           | 24.9%                                           | 50.2%                       | 58.9%           |
| [56.3-59.7]                                                                                                                                     | [59.7-63.0] | [60.2-65.2] | [23.0-40.2]                | [22.9-41.0] | [23.0-42.0] | [18.0-36.2]                  | [19.8-37.2] | [19.0-36.6] | [53.9-96.4]                                        | [107.8-192.8]               | [136.8-210.3]   | [24.1-25.7]                                     | [48.6-51.9]                 | [56.0-61.8]     |
| <i>Assuming an alternative form of the transmission rate (12f)</i>                                                                              |             |             |                            |             |             |                              |             |             |                                                    |                             |                 |                                                 |                             |                 |
| 57.9%                                                                                                                                           | 61.4%       | 62.8%       | 28.9                       | 30.4        | 33.0        | 25.0                         | 26.6        | 26.0        | 75.1                                               | 150.2                       | 172.6           | 25.0%                                           | 50.3%                       | 58.9%           |
| [56.2-59.6]                                                                                                                                     | [59.8-63.1] | [60.3-65.2] | [23.0-40.1]                | [22.8-40.9] | [23.0-41.9] | [18.0-36.2]                  | [19.7-37.2] | [19.0-36.6] | [53.9-96.4]                                        | [107.8-192.8]               | [136.8-210.3]   | [24.1-25.9]                                     | [48.4-52.3]                 | [55.7-62.1]     |
| <i>Assuming the same proportion of viral suppression among non-participants as among participants of the same age, gender, and survey round</i> |             |             |                            |             |             |                              |             |             |                                                    |                             |                 |                                                 |                             |                 |
| 57.9%                                                                                                                                           | 61.4%       | 62.8%       | 28.6                       | 30.0        | 33.0        | 25.0                         | 26.7        | 25.9        | 71.7                                               | 143.3                       | 143.5           | 26.7%                                           | 53.6%                       | 52.2%           |
| [56.2-59.6]                                                                                                                                     | [59.7-63.0] | [60.2-65.2] | [22.8-40.2]                | [22.6-40.9] | [23.6-41.5] | [18.0-36.3]                  | [19.6-37.2] | [19.0-36.5] | [54.6-89.5]                                        | [109.3-179.0]               | [114.1-175.7]   | [26.1-27.2]                                     | [52.4-54.7]                 | [47.0-57.1]     |
| <i>Assuming that non-participants are not suppressed</i>                                                                                        |             |             |                            |             |             |                              |             |             |                                                    |                             |                 |                                                 |                             |                 |
| 58.0%                                                                                                                                           | 61.4%       | 62.7%       | 28.5                       | 30.1        | 34.0        | 25.0                         | 26.8        | 26.3        | 254.7                                              | 329.9                       | 351.9           | 52.3%                                           | 68.1%                       | 74.6%           |
| [56.3-59.7]                                                                                                                                     | [59.8-63.0] | [60.2-65.2] | [22.8-40.1]                | [22.5-41.1] | [24.0-42.0] | [18.0-36.2]                  | [19.8-37.2] | [19.0-37.9] | [232.7-275.5]                                      | [300.0-358.6]               | [333.4-372.5]   | [50.0-54.6]                                     | [65.8-70.5]                 | [73.4-75.8]     |
| <i>Assuming that prevalence in non-participants is 25% higher than in participants</i>                                                          |             |             |                            |             |             |                              |             |             |                                                    |                             |                 |                                                 |                             |                 |
| 58.0%                                                                                                                                           | 61.5%       | 62.7%       | 28.6                       | 30.1        | 33.5        | 25.0                         | 26.8        | 26.0        | 81.9                                               | 163.9                       | 189.3           | 25.2%                                           | 50.7%                       | 58.3%           |
| [56.3-59.7]                                                                                                                                     | [59.8-63.1] | [60.2-65.1] | [22.8-40.2]                | [22.6-41.0] | [23.7-41.6] | [18.0-36.3]                  | [19.7-37.2] | [19.0-36.4] | [58.9-105.1]                                       | [117.7-210.1]               | [150.4-230.4]   | [24.2-26.2]                                     | [48.6-52.9]                 | [54.8-61.7]     |
| <i>Assuming that prevalence in men non-participants is 25% higher than in men participants</i>                                                  |             |             |                            |             |             |                              |             |             |                                                    |                             |                 |                                                 |                             |                 |
| 58.2%                                                                                                                                           | 61.6%       | 62.9%       | 28.6                       | 30.1        | 33.5        | 25.0                         | 26.7        | 26.0        | 81.9                                               | 163.9                       | 189.3           | 25.1%                                           | 50.6%                       | 58.4%           |
| [56.5-59.8]                                                                                                                                     | [60.0-63.3] | [60.4-65.4] | [22.8-40.2]                | [22.6-41.0] | [23.6-41.6] | [18.0-36.2]                  | [19.6-37.2] | [19.0-36.4] | [58.9-105.1]                                       | [117.7-210.1]               | [150.4-230.4]   | [24.1-26.2]                                     | [48.5-52.9]                 | [54.9-61.8]     |
| <i>Assuming that prevalence in women non-participants is 25% higher than in women participants</i>                                              |             |             |                            |             |             |                              |             |             |                                                    |                             |                 |                                                 |                             |                 |
| 57.8%                                                                                                                                           | 61.2%       | 62.5%       | 28.5                       | 30.0        | 33.4        | 25.0                         | 26.8        | 26.0        | 75.1                                               | 150.2                       | 172.6           | 25.1%                                           | 50.6%                       | 58.4%           |
| [56.0-59.4]                                                                                                                                     | [59.6-62.8] | [60.0-64.9] | [22.8-40.2]                | [22.6-41.0] | [23.6-41.6] | [18.0-36.3]                  | [19.7-37.2] | [19.0-36.4] | [53.9-96.4]                                        | [107.8-192.8]               | [136.8-210.3]   | [24.1-26.2]                                     | [48.5-52.8]                 | [55.0-61.7]     |
| <i>Defining viral suppression as a viral load measurement below 200 copies/mL plasma blood</i>                                                  |             |             |                            |             |             |                              |             |             |                                                    |                             |                 |                                                 |                             |                 |
| 57.9%                                                                                                                                           | 61.4%       | 62.8%       | 28.6                       | 30.2        | 33.1        | 25.0                         | 27.0        | 26.0        | 73.2                                               | 146.4                       | 197.2           | 22.8%                                           | 46.0%                       | 61.6%           |
| [56.2-59.6]                                                                                                                                     | [59.7-63.0] | [60.3-65.2] | [22.9-40.2]                | [22.6-41.0] | [23.6-41.5] | [18.0-36.3]                  | [19.7-37.3] | [19.1-36.6] | [51.7-94.5]                                        | [103.5-189.1]               | [161.7-234.6]   | [21.7-24.0]                                     | [43.7-48.5]                 | [58.1-64.9]     |
| <i>Without adjustments for potentially unequal sampling of sources</i>                                                                          |             |             |                            |             |             |                              |             |             |                                                    |                             |                 |                                                 |                             |                 |
| 57.9%                                                                                                                                           | 61.4%       | 62.8%       | 29.0                       | 30.6        | 33.7        | 25.0                         | 26.3        | 26.0        | 75.1                                               | 150.2                       | 172.6           | 25.2%                                           | 50.6%                       | 58.4%           |
| [56.1-59.6]                                                                                                                                     | [59.8-63.1] | [60.2-65.2] | [22.7-40.0]                | [22.5-40.8] | [23.5-41.4] | [18.0-36.1]                  | [19.7-37.2] | [19.0-36.2] | [53.9-96.4]                                        | [107.8-192.8]               | [136.8-210.3]   | [24.2-26.2]                                     | [48.7-52.7]                 | [55.1-61.6]     |

Supplementary Table S10: Sensitivity analyses (continued).

## 93 **References**

- 94 [1] Gall, A. *et al.* Universal amplification, next-generation sequencing, and assembly  
95 of HIV-1 genomes. *Journal of Clinical Microbiology* **50**, 3838–3844 (2012) .
- 96 [2] Bonsall, D. *et al.* A comprehensive genomics solution for hiv surveillance and  
97 clinical monitoring in low-income settings. *Journal of Clinical Microbiology* **58**,  
98 e00382–20 (2020) .
